# Supplementary material
Source: publisher figshare collection journal article supplement (https://acs.figshare.com/ndownloader/files/5789931)

# Supporting Information.

## Contents:

|                                                    |   |
|----------------------------------------------------|---|
| Experimental section.....                          | 2 |
| $^1\text{H}$ and $^{13}\text{C}$ NMR spectra. .... | 7 |

## Experimental section

**Compound 2d.** Compound **1** (0.16 g, 0.6 mmol) was treated as above but with 2,2-diphenylacetic acid. Flash chromatography (pentane:Et<sub>2</sub>O, 75:25) gave 0.13 g (46%) of **2d**. <sup>1</sup>H NMR (CDCl<sub>3</sub>, 300 MHz) 7.5-7.2 (m, 10 H), 6.08 (dd, *J* = 9.9, 4.7 Hz, 1 H), 5.96 (ddd, *J* = 9.9, 5.4, 2.2 Hz), 5.43 (br s, 1 H), 5.20 (td, *J* = 5.5, 3.3 Hz, 1H), 5.38 (s, 1 H), 3.74 (s, 6H), 3.57 (m, 1 H), 3.37 (td, *J* = 11.0, 6.3 Hz, 1H), 2.29 (br pent, *J* = 6.8 Hz, 1H), 1.55 (m, 2H), 1.10 (d, *J* = 6.7 Hz, 3H), 1.02 (d, *J* = 6.9 Hz, 3H); <sup>13</sup>C NMR (CDCl<sub>3</sub>, 75 MHz) 172.0, 170.3 (2C), 155.4, 138.7, 138.6, 131.7, 130.4, 128.8, 128.5, 128.4, 127.0, 125.3, 124.8, 118.6, 67.6, 65.9, 56.8, 52.5, 52.1, 45.0, 38.3, 27.8, 26.4, 21.2, 20.5 MS (EI): *m/z* = 167 (100), 157 (88).

**Compound 2e.** **1** (0.16 g, 0.6 mmol) was treated as above but with 2-chloroacetic acid. Flash chromatography (pentane:Et<sub>2</sub>O, 75:25) gave 0.10 g (49%) of **2e**. <sup>1</sup>H NMR (CDCl<sub>3</sub>, 300 MHz) 6.17 (dd, *J* = 9.9, 4.5 Hz, 1 H), 5.97 (ddd, *J* = 9.9, 5.3, 2.2 Hz, 1 H), 5.27 (br s, 1H), 5.20 (td, *J* = 5.5, 3.3 Hz, 1 H), 4.08 (s, 2H), 3.74 (s, 3H), 3.70 (s, 3H), 3.59 (m, 1 H), 3.42 (td, *J* = 11.3, 6.4 Hz, 1H), 2.30 (br pent, *J* = 6.9 Hz, 1H), 1.55 (m, 2H), 1.10 (d, *J* = 6.7 Hz 3H), 1.03 (d, *J* = 6.9 Hz, 3H); <sup>13</sup>C NMR (CDCl<sub>3</sub>, 100 MHz) 170.6 (2C), 167.2, 155.5, 132.7, 124.6, 119.0, 68.0, 67.6, 53.0, 52.6, 45.3, 41.4, 38.5, 28.1, 26.7, 21.6, 20.9 MS (EI): *m/z* = 212 (100), 157 (89).

**Compound 2f.** **1** (0.16 g, 0.6 mmol) was treated as above but with 3-butenic acid. Flash chromatography (pentane:Et<sub>2</sub>O, 75:25) gave 0.09 g (43%) of **2f**. <sup>1</sup>H NMR (CDCl<sub>3</sub>, 300 MHz) 6.10 (dd, *J* = 10.3, 4.8 Hz, 1 H), 6.0-5.8 (m, 2 H), 5.44 (br s, 1H) 5.2-5.1 (m, 3H), 3.76 (s, 3H), 3.72 (s, 3H), 3.58 (m, 1 H), 3.43 (td, *J* = 10.9, 7.1 Hz, 1H), 3.10 (d, *J* = 7.1 Hz, 2H), 2.29 (br pent, *J* = 6.8 Hz, 1H), 1.55 (m, 2H), 1.10 (d, *J* = 6.7 Hz 3H), 1.02 (d, *J* = 6.9 Hz, 3H); <sup>13</sup>C NMR (CDCl<sub>3</sub>, 75 MHz) 171.2, 170.4,

155.4, 131.4, 128.8, 125.0, 118.6, 118.4, 65.4, 52.6, 52.2, 45.0, 44.4, 39.1, 38.3, 27.8, 26.5, 21.2, 20.5 MS (EI):  $m/z$  = 212 (100), 157 (84).

**Compound 2g. 1** (0.13 g, 0.5 mmol) was treated as above but with sorbic acid. Flash chromatography (pentane:Et<sub>2</sub>O, 75:25) gave 0.13 g (71%) of **2g**. <sup>1</sup>H NMR (CDCl<sub>3</sub>, 400 MHz) 7.25 (m, 1H), 6.17 (m, 2H), 6.10 (dd,  $J$  = 10.1, 4.6 Hz), 1 H), 6.00 (ddd,  $J$  = 10.1, 5.5, 2.2 Hz, 1 H), 5.78 (d,  $J$  = 15.4 Hz, 1H), 5.44 (br s, 1H) 5.20 (dt,  $J$  = 5.3, 3.3 Hz, 1H), 3.74 (s, 3H), 3.70 (s, 3H), 3.59 (m, 1 H), 3.47 (td,  $J$  = 11.9, 5.8 Hz, 1H), 2.32 (br pent,  $J$  = 7.1, 1H), 1.85 (d,  $J$  = 5.2 Hz, 3H), 1.57 (br s, 2H), 1.11 (d,  $J$  = 6.9 Hz, 3H), 1.03 (d,  $J$  = 6.9 Hz, 3H); <sup>13</sup>C NMR (CDCl<sub>3</sub>, 100 MHz) 170.4 (2C), 166.2, 155.5, 145.0, 139.3, 131.2, 129.6, 125.4, 119.0, 118.5, 67.8, 64.7, 52.5, 52.2, 45.0, 38.4, 27.8, 26.6, 21.2, 20.5, 18.5. MS (EI):  $m/z$  = 212 (100), 157 (84).

**Compound 2h. 1** (0.060 g, 0.22 mmol) was treated as above but with pentafluorophenol. Flash chromatography (pentane:Et<sub>2</sub>O, 90:10) gave 0.044 g (44%) of **2h**. <sup>1</sup>H NMR (CDCl<sub>3</sub>, 400 MHz) 6.19 (dd,  $J$  = 9.8, 3.7 Hz, 1H), 5.94 (dd,  $J$  = 9.8, 5.1 Hz, 1 H), 5.47 (br s, 1H), 4.54 (td,  $J$  = 5.1, 3.0 Hz, 1H), 3.8-3.6 (m including singlets at 3.72 and 3.70, 8H), 2.28 (br pent,  $J$  = 6.8 Hz, 1H), 1.8-1.4 (m, 2H), 1.11 (d,  $J$  = 6.8 Hz, 3H), 1.03 (d,  $J$  = 6.8 Hz, 3H); <sup>13</sup>C NMR (CDCl<sub>3</sub>, 100 MHz) 170.7, 170.5, (Aromatic carbons are not clearly detectable due to C-F coupling), 155.5, 133.4, 124.7, 119.2, 76.0 (broaden due to C-F coupling), 68.0, 52.9, 52.4, 45.6, 38.2, 28.2, 27.3, 21.6, 20.9.; MS (EI):  $m/z$  = 341 (10), 217 (48), 157 (100).

**Compound 2i.** To a solution of **1** (0.075 g, 0.27 mmol) in 3 mL of BnOH was added lithium carbonate (0.07 g, 1.0 mmol) and Pd(dba)<sub>2</sub> (0.008 g, 0.014 mmol). The reaction was stirred at room temperature for 24 h. H<sub>2</sub>O was added and the aqueous layer extracted with Et<sub>2</sub>O (3 x 30 mL). The combined organic layers were dried (Na<sub>2</sub>SO<sub>4</sub>), evaporation followed by flash chromatography (pentane:Et<sub>2</sub>O, 1:1) bulb to

bulb distillation and again flash chromatography (pentane:Et<sub>2</sub>O, 1:1) gave 0.055 g (53%) of **2i**. <sup>1</sup>H NMR (CDCl<sub>3</sub>, 300 MHz) 8.03 (d, *J* = 7.0 Hz, 2H), 7.51 (t, *J* = 7.0 Hz, 1H), 7.44 (t, *J* = 7.0 Hz, 2H), 6.12 (m, 2H), 5.48 (br s, 1 H), 5.38 (td, *J* = 5.0, 3.3 Hz, 1 H), 3.74 (s, 3H), 3.71 (s, 3H), 3.65 (m, 1 H), 3.55 (m, 1H), 2.35 (br pent, *J* = 6.8 Hz, 1H), 1.7-1.6 (m, 2H), 1.13 (d, *J* = 6.7 Hz, 3H), 1.05 (d, *J* = 6.9 Hz, 3H); MS (EI): *m/z* = 197 (17), 107 (40), 91 (100).

**Compound 2j and 2j'.** **1** (0.075 g, 0.27 mmol) was treated using the general procedure as for **2a**. Flash chromatography (pentane:Et<sub>2</sub>O, 75:25) gave 0.082 g (78%) of a mixture of **2j** (55%) and **2j'** (45%) (unseparable on HPLC). <sup>1</sup>H NMR (CDCl<sub>3</sub>, 400 MHz) 7.45 (m, 2H), 7.35 (m, 3H), 6.10 (dd, *J* = 9.8, 3.3 Hz, 0.5H), 5.98 (d, *J* = 3.0 Hz, 1H), 5.87 (dd, *J* = 9.8, 5.7, 2.1 Hz, 0.5H), 5.42 (br s, 1H), 3.9-3.4 (m, 8H, including singlets at 3.74, 3.70 and 3.57), 3.00 (br d, *J* = 16.6 Hz, 1 H), 2.80 (br d, *J* = 16.3 Hz, 1 H), 2.32 (br pent, *J* = 6.8 Hz, 1H), 1.70 (br s, 3H), 1.62 (br s, 3H), 1.6-1.4 (m, 2H), 1.11 (d, *J* = 6.7 Hz, 3H), 1.03 (d, *J* = 6.9 Hz, 3H); <sup>13</sup>C NMR (CDCl<sub>3</sub>, 100 MHz) 170.4, 156.6, 135.1, 132.9, 132.8, 131.4, 131.0, 128.8, 128.7, 128.3, 127.6, 127.2, 125.5, 124.8, 118.2, 67.8, 62.5, 52.6, 52.5, 52.1, 45.2, 43.4, 43.0, 41.0, 38.4, 37.9, 36.5, 29.5, 27.7, 26.6, 26.0, 22.0, 21.2, 21.0, 20.5. MS (EI): *m/z* = first peak: 386 (15), 277 (35), 217 (70), 157 (100), second peak: 386 (10), 277 (22), 258 (70), 217 (55), 157 (100).

**Compound 3c.** The reaction was carried out as above, using benzoic acid as nucleophile, to give **3c** in 50% yield. <sup>1</sup>H NMR (CDCl<sub>3</sub>, 300 MHz) 8.05 (dd, *J* = 8.4, 1.4 Hz, 2H), 7.56 (m, 1H), 7.44 (m, 2H), 6.24 (ddd, *J* = 10.4, 4.0, 1.0 Hz, 1H), 5.97 (ddd, *J* = 10.2, 4.6, 2.5 Hz, 1H), 5.77 (d, *J* = 2.4 Hz, 1H), 5.36 (q, *J* = 4.5 Hz, 1H), 5.12 (bs, 1H), 5.10 (s, 1H), 3.84 (m, 1H), 3.76 (s, 3H), 3.74 (s, 3H), 3.65 (m, 1H), 1.98 (ddd, *J* = 13.9, 10.4, 4.4 Hz, 1H), 1.96 (s, 3H), 1.82 (dt, *J* = 13.8, 10.0, 5.0 Hz, 1H);

$^{13}\text{C}$  NMR ( $\text{CDCl}_3$  75 MHz) 170.7, 170.3, 166.2, 149.0, 138.5, 133.1, 131.7, 130.6, 129.8, 128.5, 125.5, 124.2, 115.4, 68.2, 65.8, 53.0, 52.8, 44.2, 39.1, 27.4, 21.7. Anal. Calcd. for  $\text{C}_{23}\text{H}_{24}\text{O}_6$ : C, 69.68; H, 6.10. Found: C, 69.64; H, 6.20.

**Compound 3d.** The reaction was carried out as above, using propionic acid as nucleophile, to give **3d** in 42% yield.  $^1\text{H}$  NMR ( $\text{CDCl}_3$  300MHz) 6.18 (ddd,  $J$  = 10.3, 3.9, 0.9 Hz, 1H), 5.83 (ddd,  $J$  = 10.2, 4.5, 2.5 Hz, 1H), 5.73 (d,  $J$  = 2.3 Hz, 1H) 5.10 (consealed q,  $J$  ~ 4.8 Hz, 1H), 5.09 (bs, 1H), 5.07 (bs, 1H) 3.77 (s, 3H) 3.75 (m, 1H) 3.72 (s, 3H), 3.55 (ddd,  $J$  = 15.3, 6.7, 5.1 Hz, 1H), 2.32 (q,  $J$  = 7.6 Hz, 2H), 1.93 (s, 3H), 1.87 (ddd,  $J$  = 14.6, 10.3, 4.61 Hz, 1H), 1.66 (m, 1H) 1.13 (t,  $J$  = 7.54 Hz, 3H).  $^{13}\text{C}$  NMR ( $\text{CDCl}_3$  75 MHz): 174.2, 170.7, 170.3, 149.0, 138.5, 131.4, 125.6, 124.2, 115.4, 68.2, 65.0, 53.0, 52.8, 44.1, 39.0, 29.8, 27.9, 27.2, 21.6.

**Compound 3e.** The reaction was carried out as above, using 3-butenic acid as nucleophile, to give **3e** in 19% yield.  $^1\text{H}$  NMR ( $\text{CDCl}_3$  300 MHz): 6.19 (ddd,  $J$  = 10.2, 3.9, 1.0 Hz, 1H), 5.84 (ddd,  $J$  = 10.4, 4.6, 2.4 Hz, 1H), 5.74 (d,  $J$  = 2.4 Hz, 1H), 5.17 (m, 3H), 5.11 (br s, 1H), 5.07 (s, 1H), 3.75 (m, 7H), 3.55 (ddd,  $J$  = 10.0, 6.8, 5.2 Hz, 1H), 3.09 (dt  $J$  = 6.9, 1.5 Hz, 2H), 1.99 (s, 3H), 1.89 (m, 1H), 1.67 (dt,  $J$  = 14.0, 5.1 Hz, 1H).  $^{13}\text{C}$  NMR ( $\text{CDCl}_3$  75 MHz): 171.4, 170.8, 170.4, 149.0, 138.5, 131.6, 130.5, 125.5, 124.3, 118.8, 115.5, 68.2, 65.6, 53.1, 52.9, 44.1, 39.5, 39.1, 27.3, 21.7.

**Compound 3f.** The reaction was carried out as above, using 2-methyl-propionic acid as nucleophile, to give **3f** in 15% yield.  $^1\text{H}$  NMR ( $\text{CDCl}_3$  400 MHz): 6.17 (dd,  $J$  = 10.3, 3.9 Hz, 1H), 5.82 (ddd,  $J$  = 10.3, 4.4, 2.5 Hz, 1H) 5.74 (d,  $J$  = 2.3 Hz, 1H), 5.09 (m, 3H), 3.78 (s, 3H), 3.76 (m, 1H), 3.73 (s, 3H), 3.54 (ddd,  $J$  = 11.9, 9.9, 6.9 Hz, 1H), 2.54 (hept,  $J$  = 7.0 Hz, 1H), 1.93 (s, 3H), 1.89 (ddd,  $J$  = 14.5, 9.9, 4.6 Hz, 1H) 1.65 (ddd,  $J$  = 13.9, 10.2, 4.9 Hz, 1H) 1.16 (d,  $J$  = 2.6 Hz, 3H) 1.15 (d,  $J$  = 2.6 Hz,

3H).  $^{13}\text{C}$  NMR ( $\text{CDCl}_3$ , 400 MHz): 176.9, 170.8, 170.3, 149.0, 138.4, 131.3, 125.6, 124.2, 115.4, 68.1, 64.9, 53.0, 52.9, 44.0, 39.1, 34.1, 27.2, 21.6, 19.2, 19.1.

# <sup>1</sup>H and <sup>13</sup>C NMR spectra.

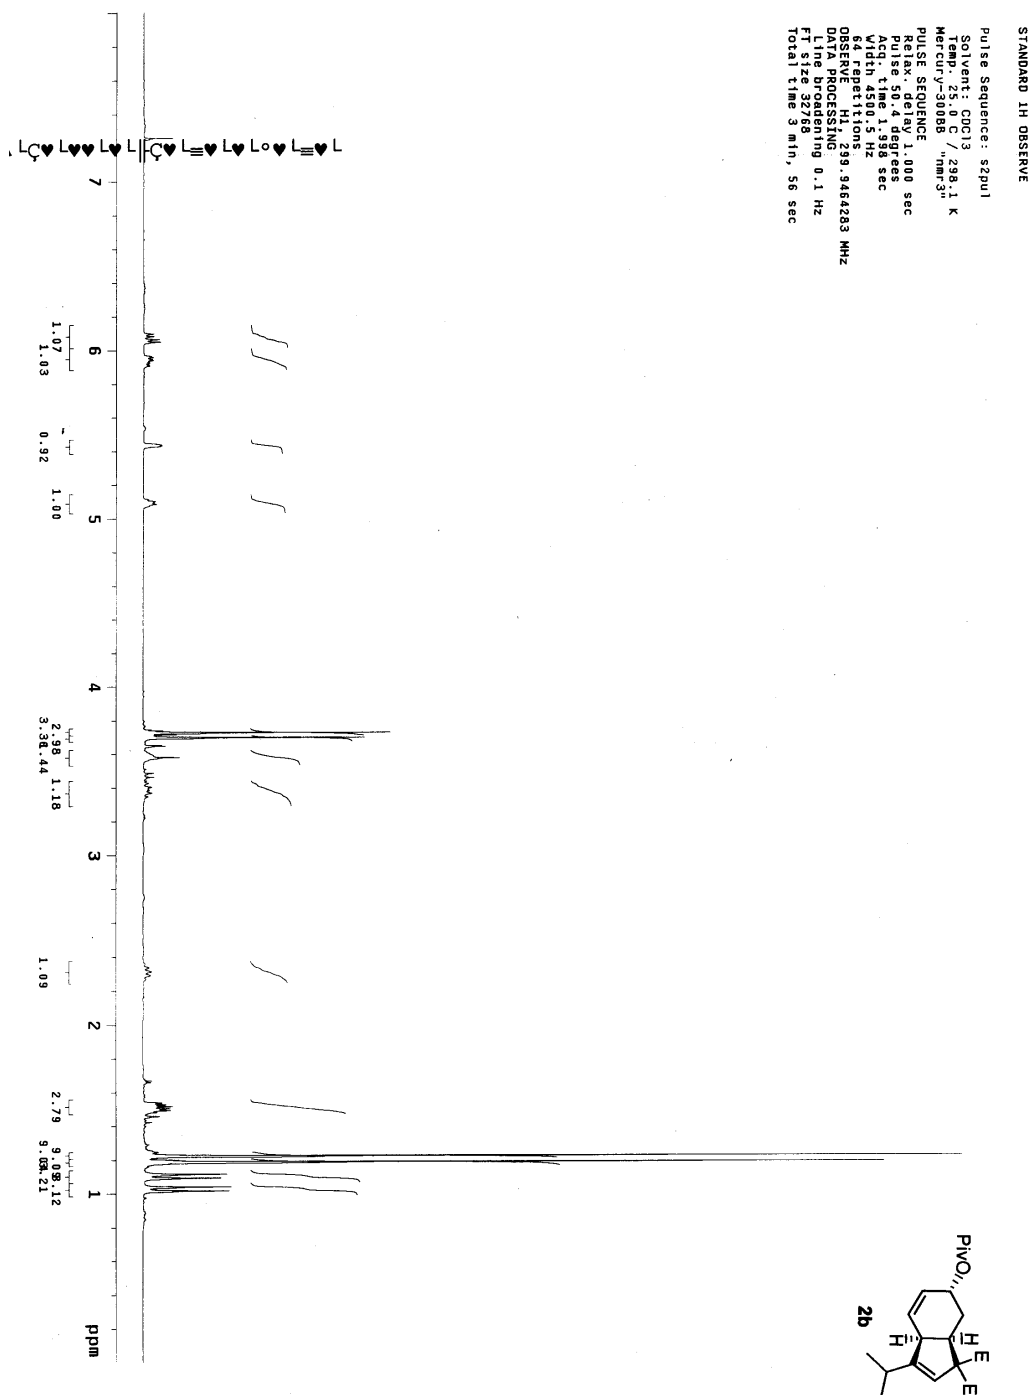

Chemical structure of compound **2b**, a bicyclic molecule. It features a pivalate group (PivO) attached to a cyclohexene ring, and an isopropyl group attached to a fused cyclopentene ring. Stereochemistry is indicated with wedges and dashes.

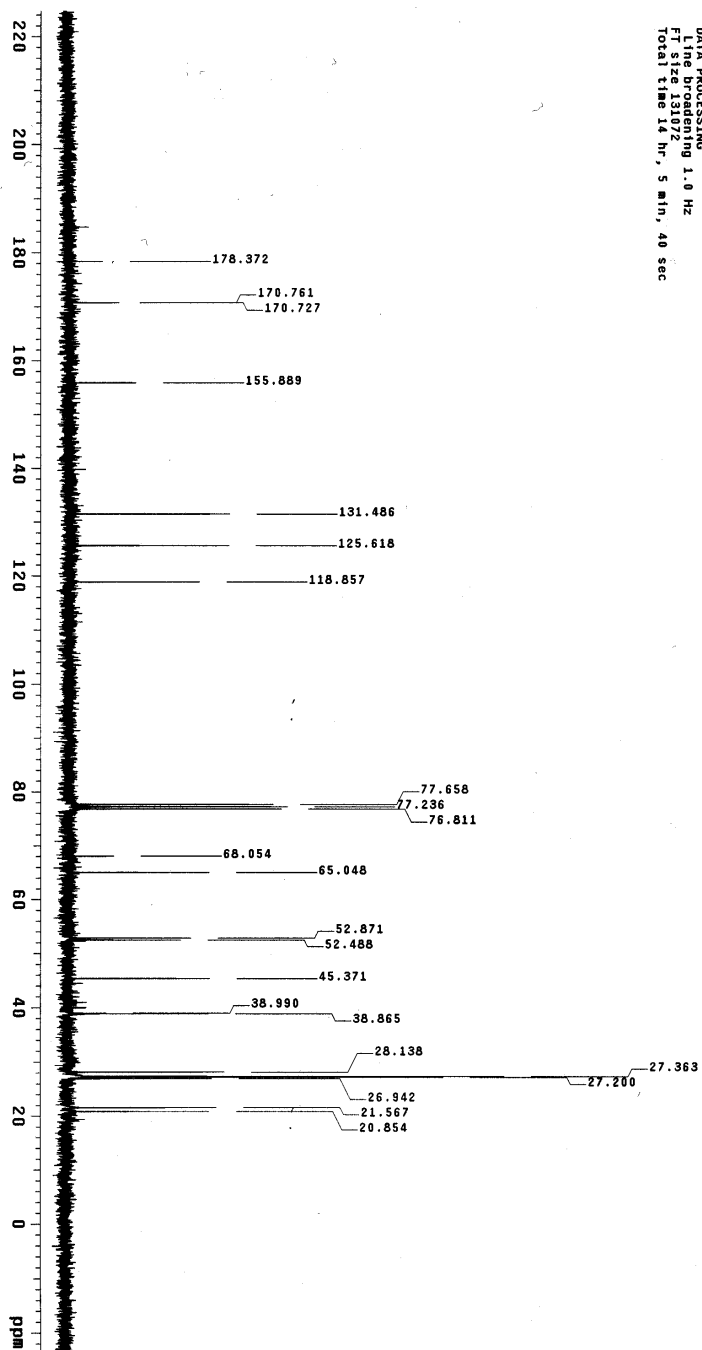



2c  
 Pulse Sequence: s2pul  
 Solvent: CDCl3  
 Temp: 25.0 C / 298.1 K  
 Mercury-300MB "nmr3"  
 Relax: delay 1.000 sec  
 Pulse 57.3 degrees  
 Acq: 166.1398 sec  
 Width: 600.5 Hz  
 16 repetitions  
 OBSERVE H1: 299.9464275 MHz  
 DATA PROCESSING  
 Line broadening 0.1 Hz  
 F2 size 2205  
 Total time 0 min, 49 sec

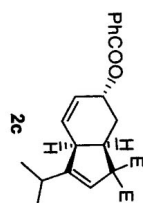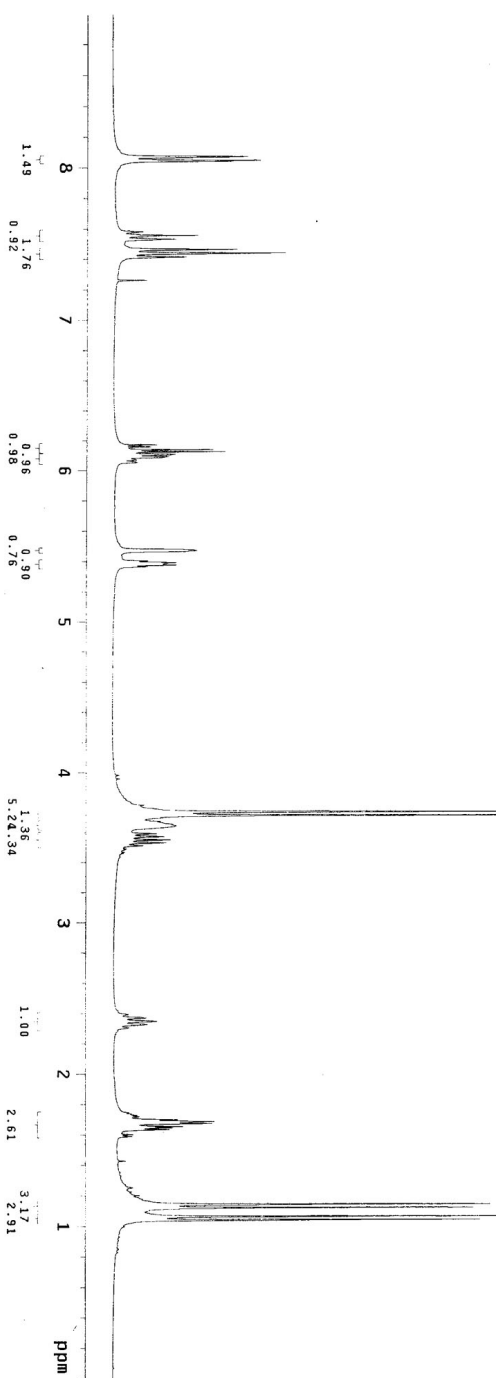

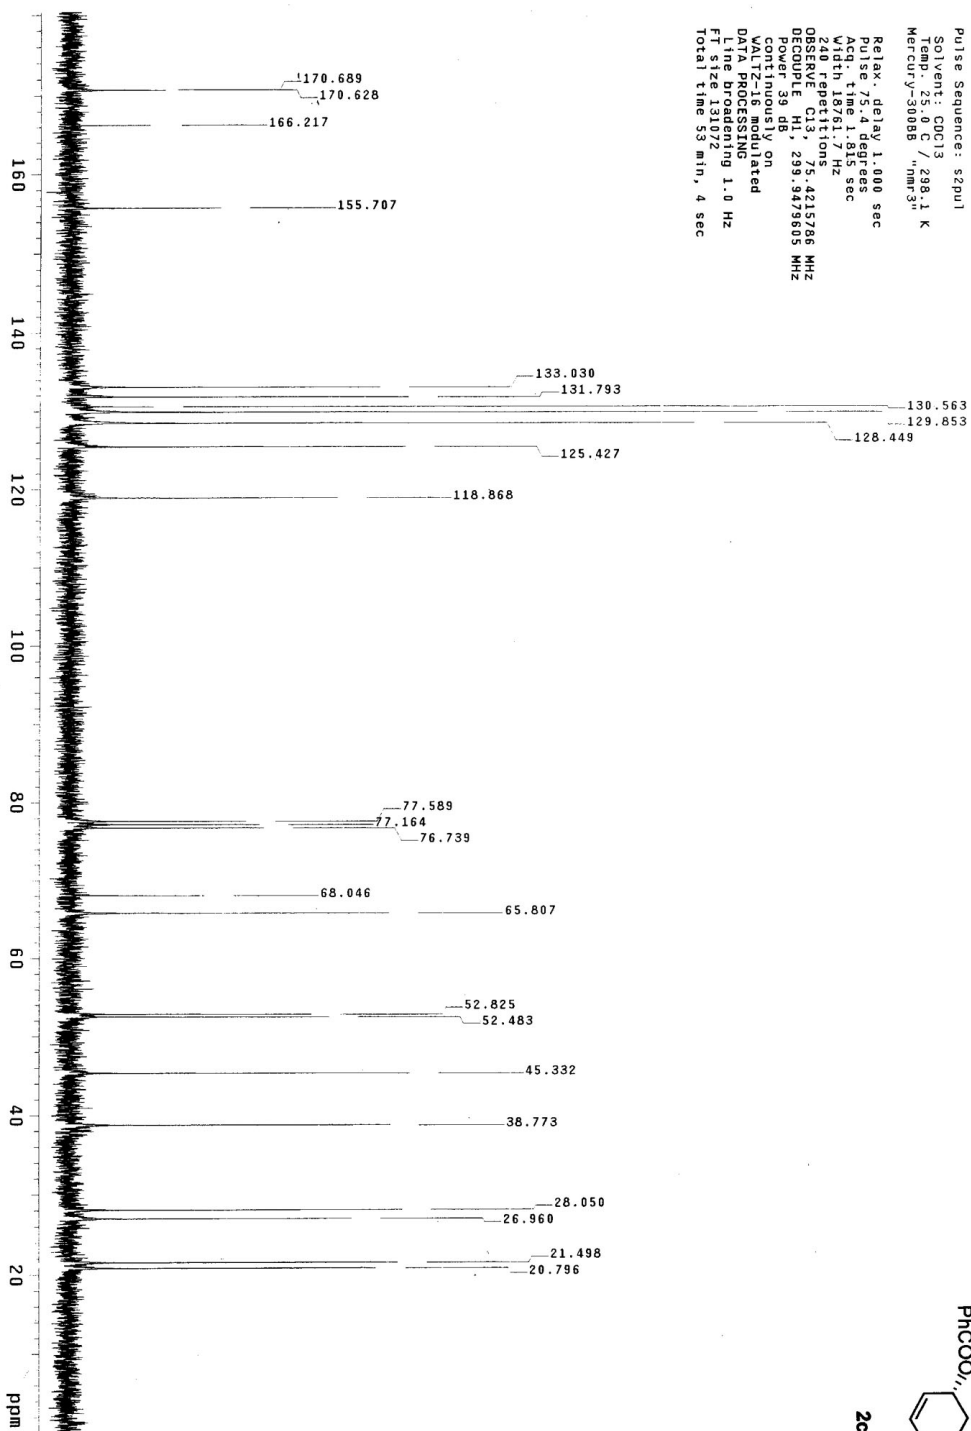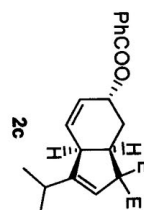

STANDARD PROTON  
Pulse Sequence: szpu1  
Solvent: CDCl3  
Temp: 25.0 C / 298.1 K  
File: H6397c  
Mercury-400B8 "nmr4"  
PULSE SEQUENCE  
Relax. delay 1.000 sec  
Pulse 13.5 degrees  
Acq time 2.711 sec  
Width 5398.8 Hz  
32 repetitions  
OBSERVE H1, 399.9408614 MHz  
DATA PROCESSING  
F2 size 65536  
FT size 65536  
Total time 2 min, 17 sec

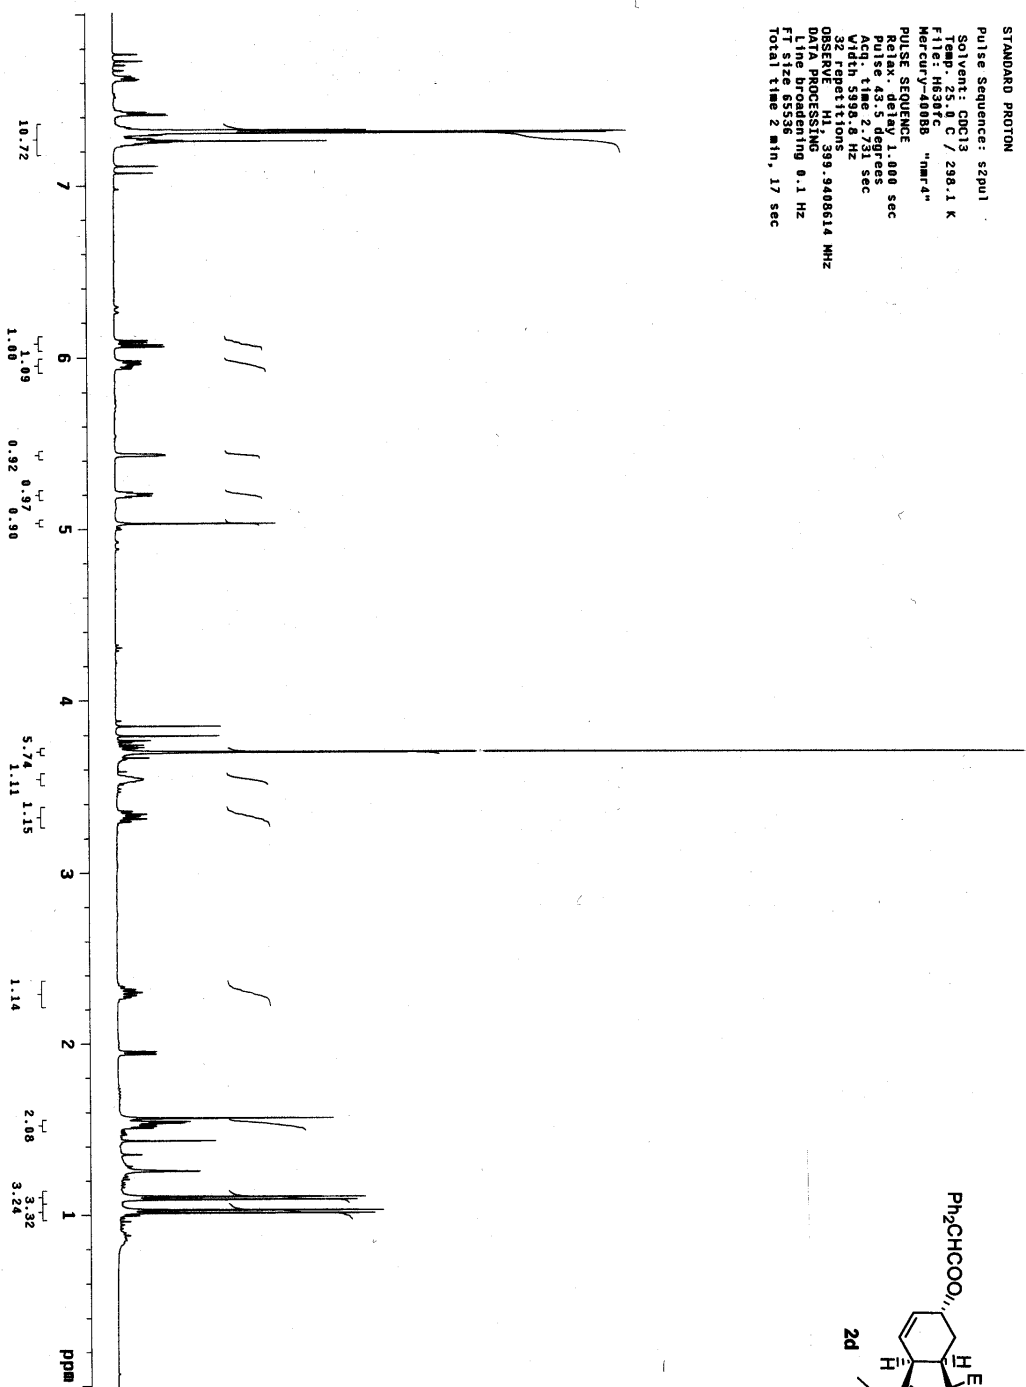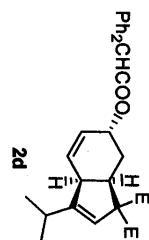

STANDARD PROTON  
Pulse Sequence: s2pul  
Solvent: CDCl3  
Temp: 25.0 C / 298.1 K  
Mercury-40088 "nmr4"  
PULSE SEQUENCE  
Relax: delay 1.000 sec  
Acq: time 2.531 sec  
Width 5396.0 Hz sec  
32 repetitions  
OBSERVE: H1, 399.9408614 MHz  
DATA PROCESSING  
SFO: 400.1464000 MHz  
FI size 65536  
Total time 2 min, 17 sec

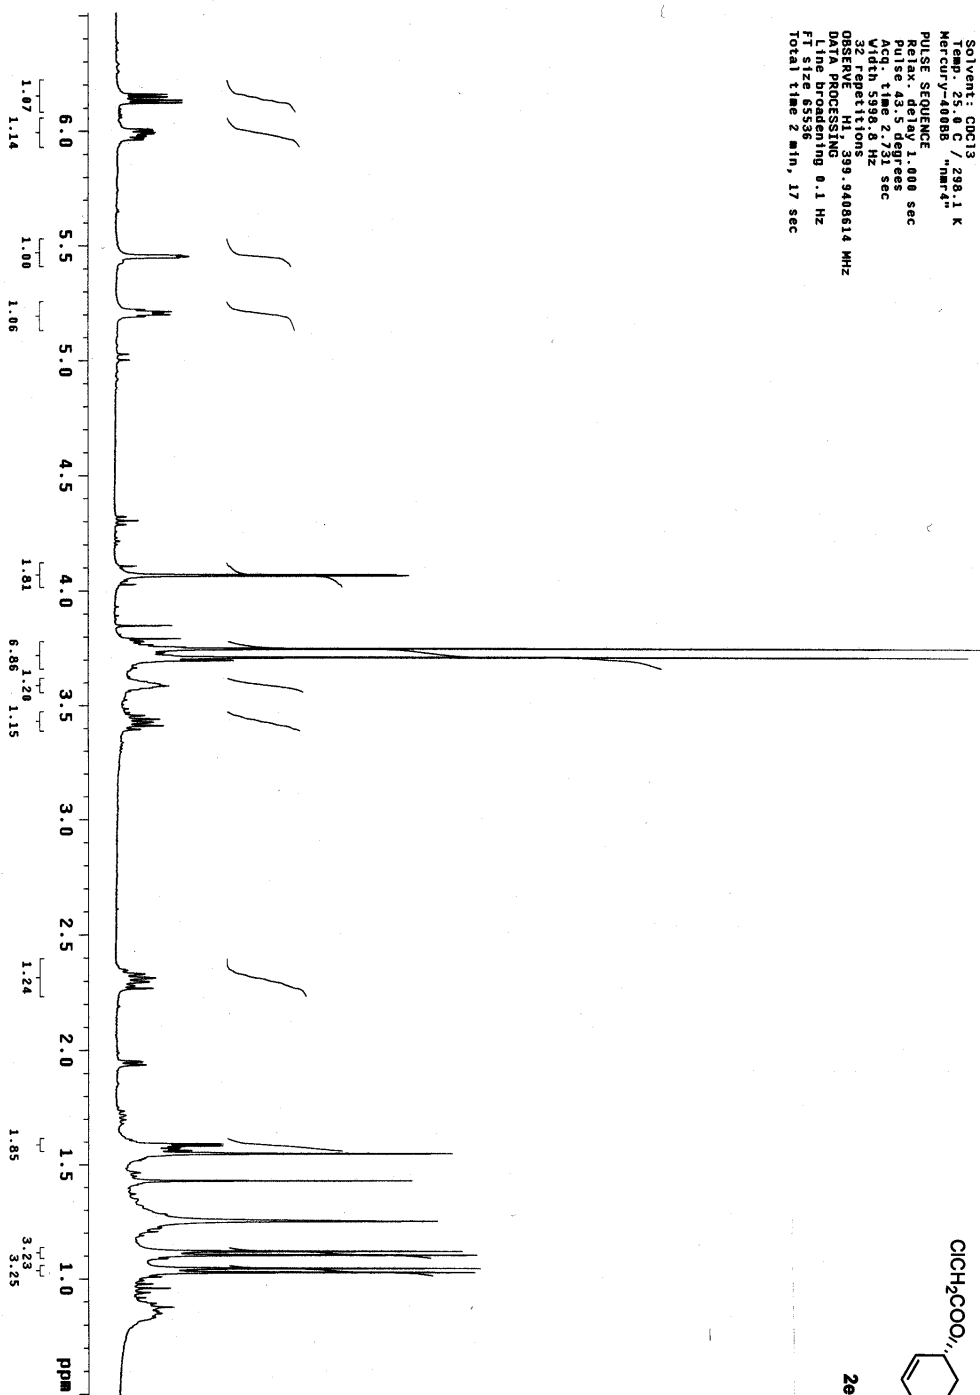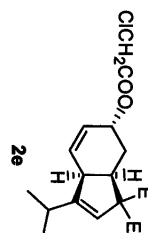

STANDARD PROTON  
Pulse Sequence: szpu1  
Solvent: CDCl3  
Temp: 25.00 / 298.1 K  
File: H629fc  
Mercury-400BB "nmr4"  
PULSE SEQUENCE  
Relax. delay 1.000 sec  
Pulse 21.8 degrees  
Acq. time 2.731 sec  
Width 5387 Hz  
32 repetitions  
OBSERVE H1, 399.940814 MHz  
DATA PROCESSING  
Time broadening 0.1 Hz  
F2 - 399.940814 MHz  
Total time 2 min, 17 sec

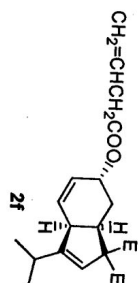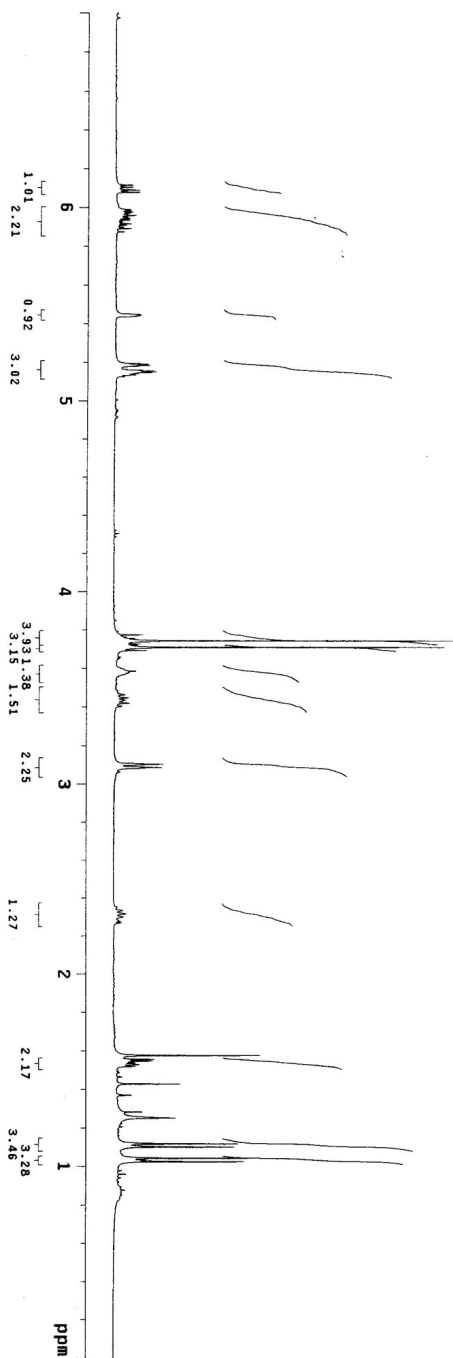

STANDARD PROTON  
 Pulse Sequence: szpul  
 Solvent: CDCl<sub>3</sub> / 298.1 K  
 Temp: 29.40°C  
 File: H5507c  
 Mercury-40068 "nmr4"  
 PULSE SEQUENCE  
 Relax, delay 1.000 sec  
 Pulse / 3 degrees  
 Width 598.8 Hz  
 64 repetitions  
 OBSERVE H1, 399.940814 MHz  
 DATA PROCESSING  
 FT size 65536  
 Total time 4 min, 35 sec

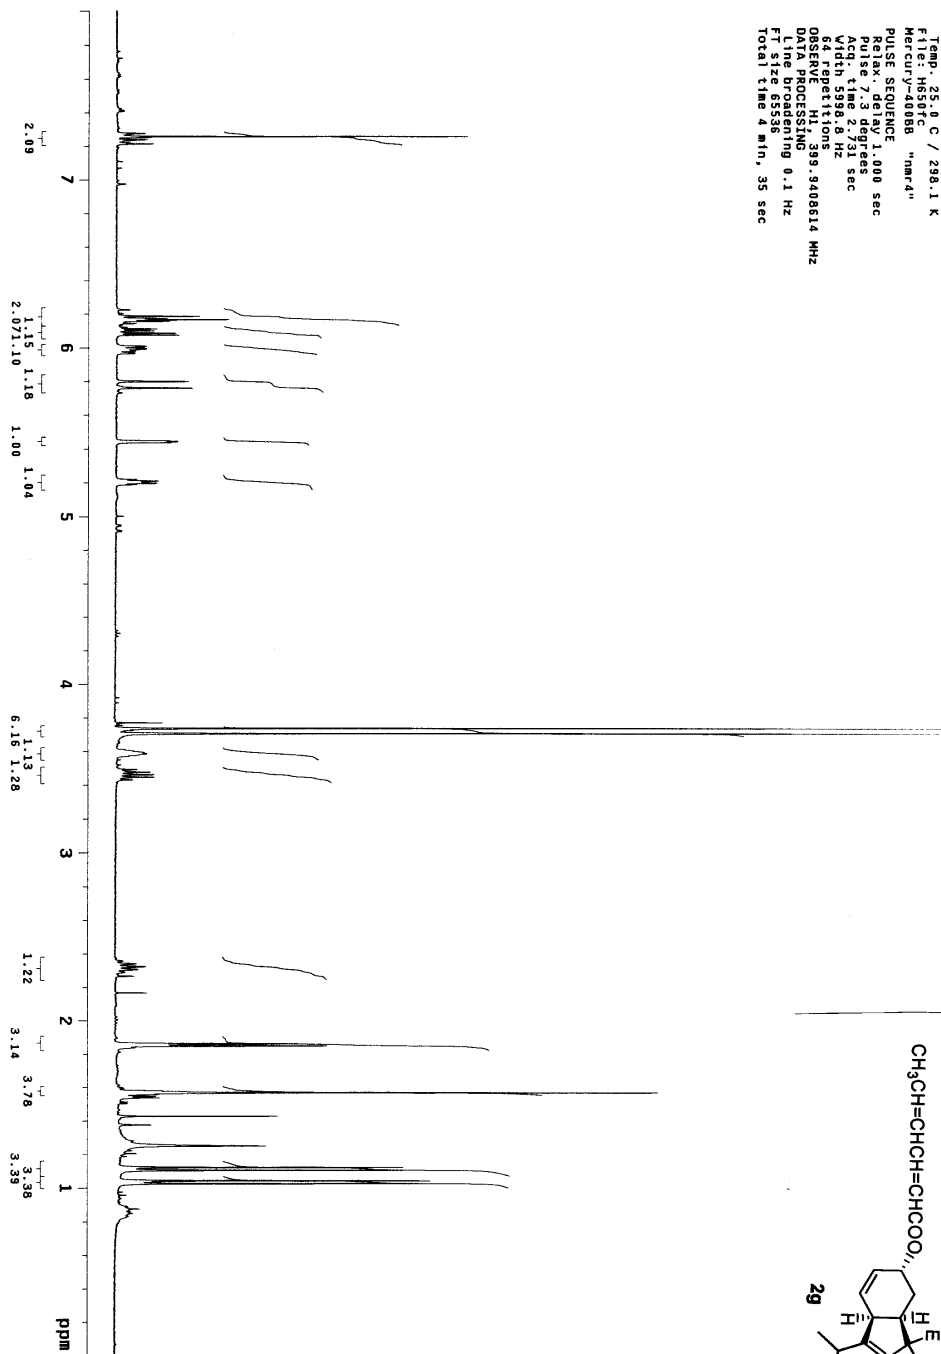

STANDARD PROTON  
Pulse Sequence: szpu1  
Solvent: CDCl3  
Temp: 25.0 C / 298.1 K  
Mercury-40088 "nmr4"  
PULSE SEQUENCE  
Relax. delay 1.000 sec  
Acq time 2.731 sec  
Width 2803.5 Hz  
32 repetitions  
OBSERVED N1: 399.940814 MHz  
NUC1: 13C  
Line broadening 0.1 Hz  
FT size 65536  
Total time 2 min, 18 sec

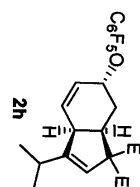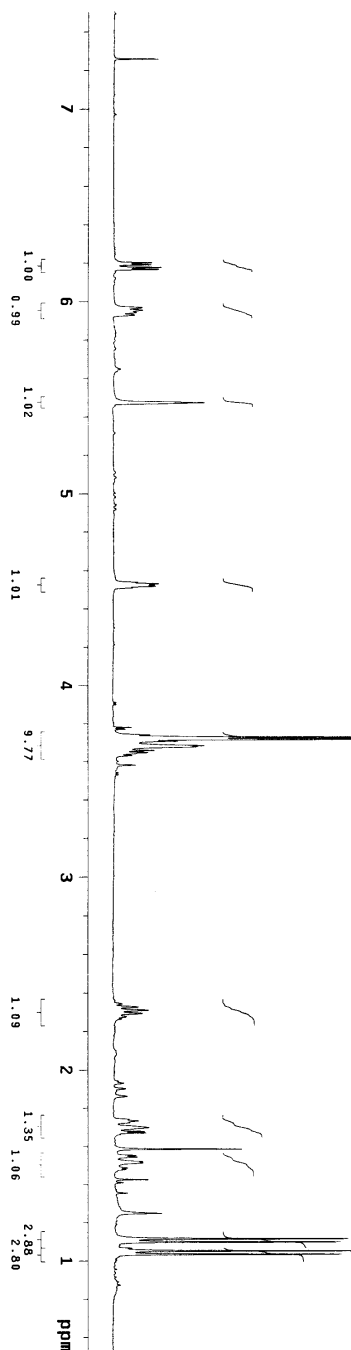

13C OBSERVE

Pulse Sequence: szpu1  
 Solvent: CDCl3  
 Temp: 25.0 C / 298.1 K  
 Mercury-400B8 "nmr4"  
 PULSE SEQUENCE  
 Relax. delay 1.000 sec  
 Pulse 30.0 degrees  
 Acq time 1.50 sec  
 Width 25000.0 Hz  
 532 repetitions  
 OBSERVE C13, 100.561856 MHz  
 DECOUPLE H1, 399.9428336 MHz  
 Power 6.00 dB  
 Postpulsing on  
 DATA PROCESSING  
 Line broadening 1.0 Hz  
 FT size 65536  
 Total time 8 hr, 54 min, 25 sec

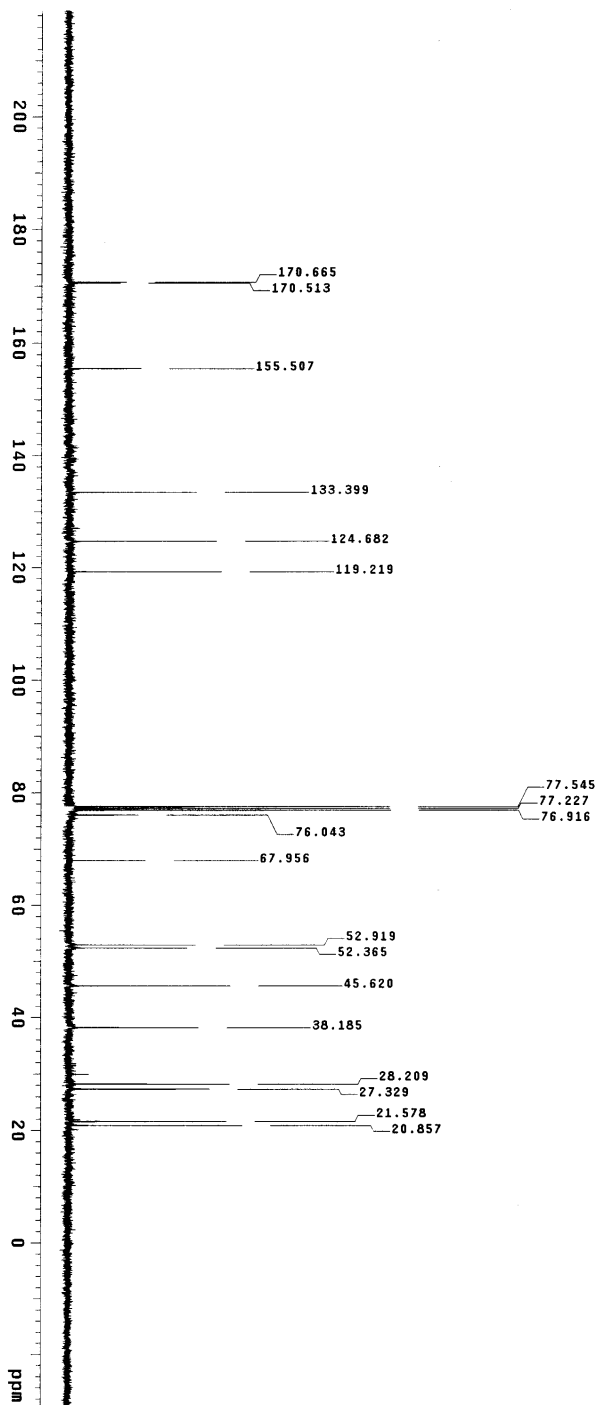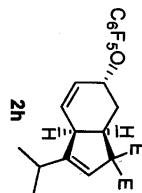



-08p  
Pulse Sequence: scpul  
Solvent: CDCl3  
Temp: 25.0 C / 298.1 K  
Mercury-300DB "nmr3"  
PULSE SEQUENCE  
Relax: delay 1.000 sec  
Pulse: 57.3 degrees  
Acq: time 1.988 sec  
Nuc1: 13C  
16 repetitions  
OBSERVE: H1, 299.9464279 MHz  
DATA PROCESSING  
Line broadening 0.1 Hz  
SI 320000  
Total time 0 min, 49 sec

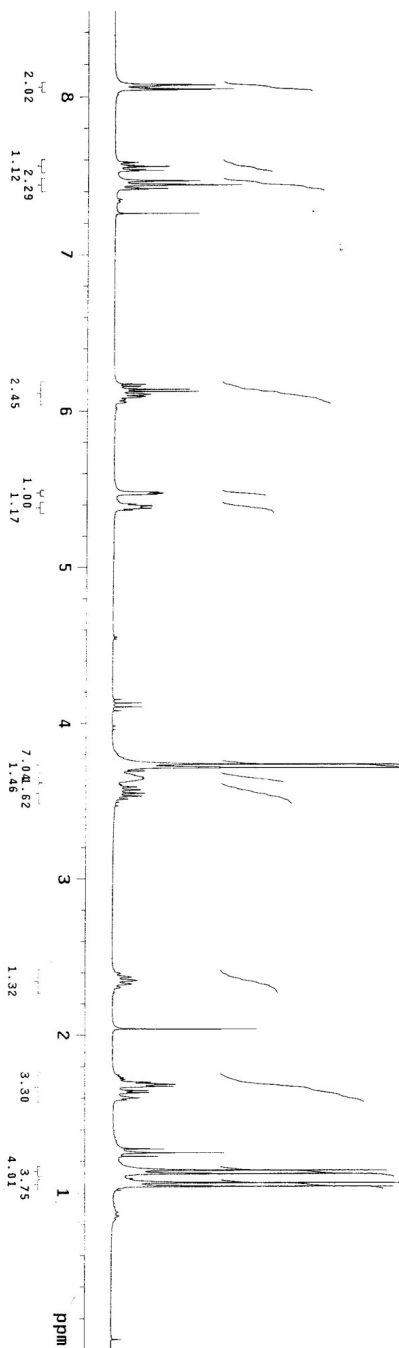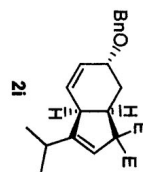

Peak 4.12 (q), 2.05 (t),  
1.26 (s) ppm. EtOAc.

STANDARD 1H OBSERVE

Pulse Sequence: s2pu1  
 Solvent: CDCl3 / 298.1 K  
 Scan 2.4  
 Mercury-300SB "mer3"  
 PULSE SEQUENCE  
 Relax. delay 1.000 sec  
 Pulse 50.4 degrees  
 Acq. time 1.398 sec  
 128  
 128  
 128  
 OBSERVE H1 239.9464283 MHz  
 DATA PROCESSING  
 Line broadening 0.1 Hz  
 F1 size 32758  
 Total time 7 min, 52 sec

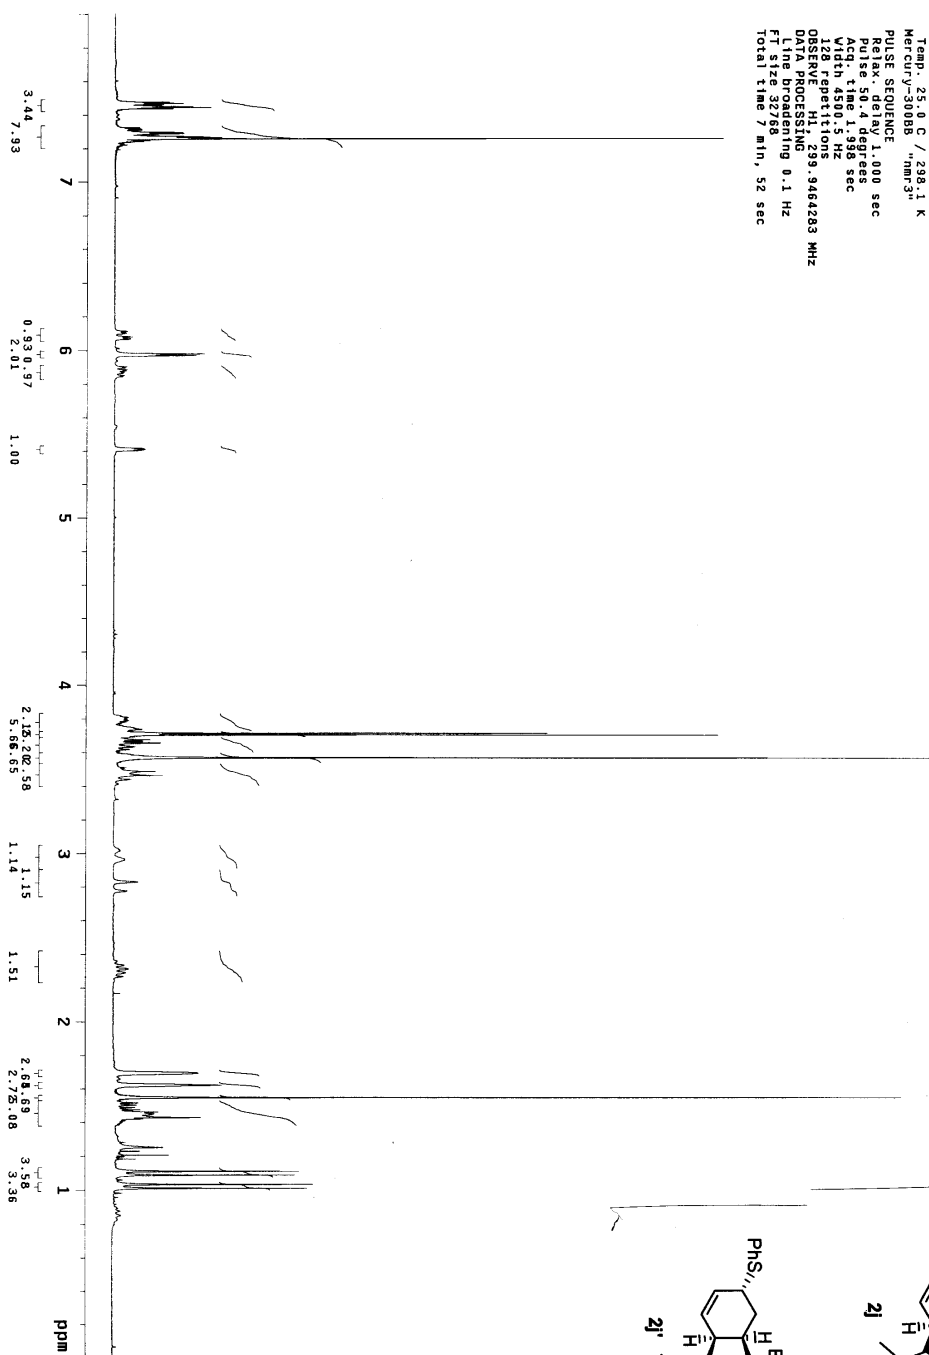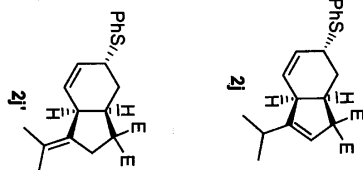

3b  
Pulse Sequence: szpu1  
Solvent: Benzene  
Temp: 25.0 C / 288.1 K  
Mercury-300SB 1mm3  
Relax. delay 1.000 sec  
Pulse 57.3 degrees  
Acq. time 1.998 sec  
Width 4500.5 Hz  
16 repetitions  
Sensitivity 29.9464413 MHz  
Data Processing  
Line broadening 0.1 Hz  
FT size 32768  
Total time 0 min, 49 sec

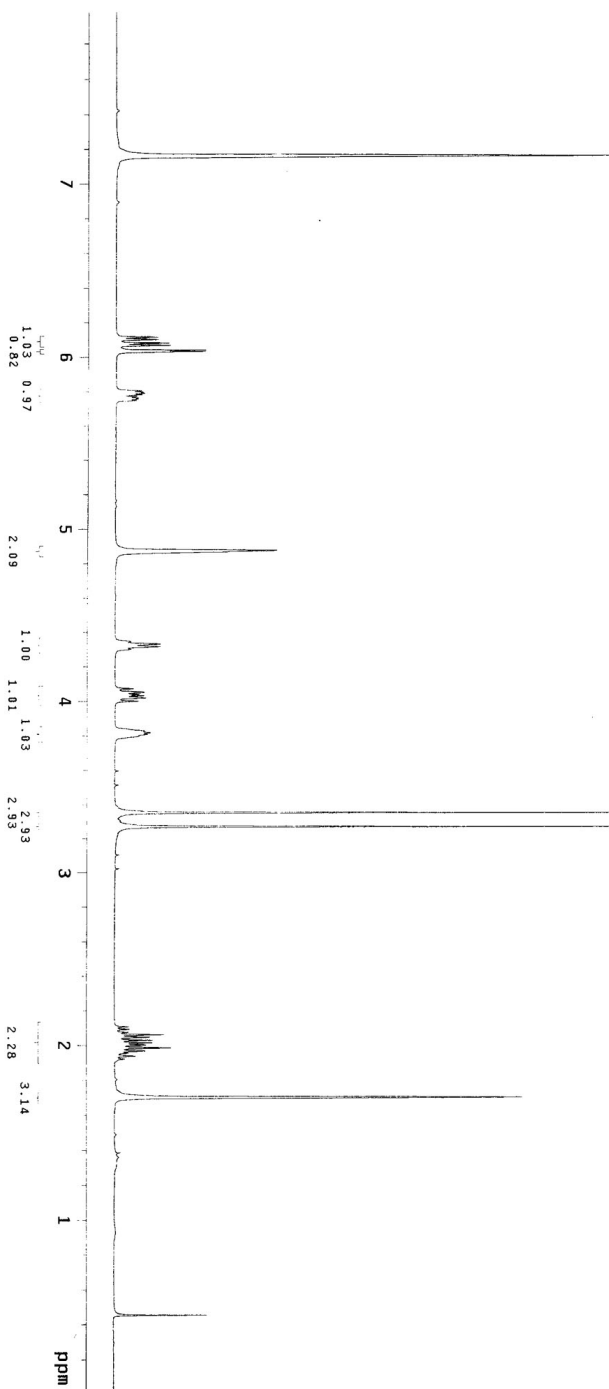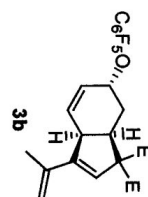

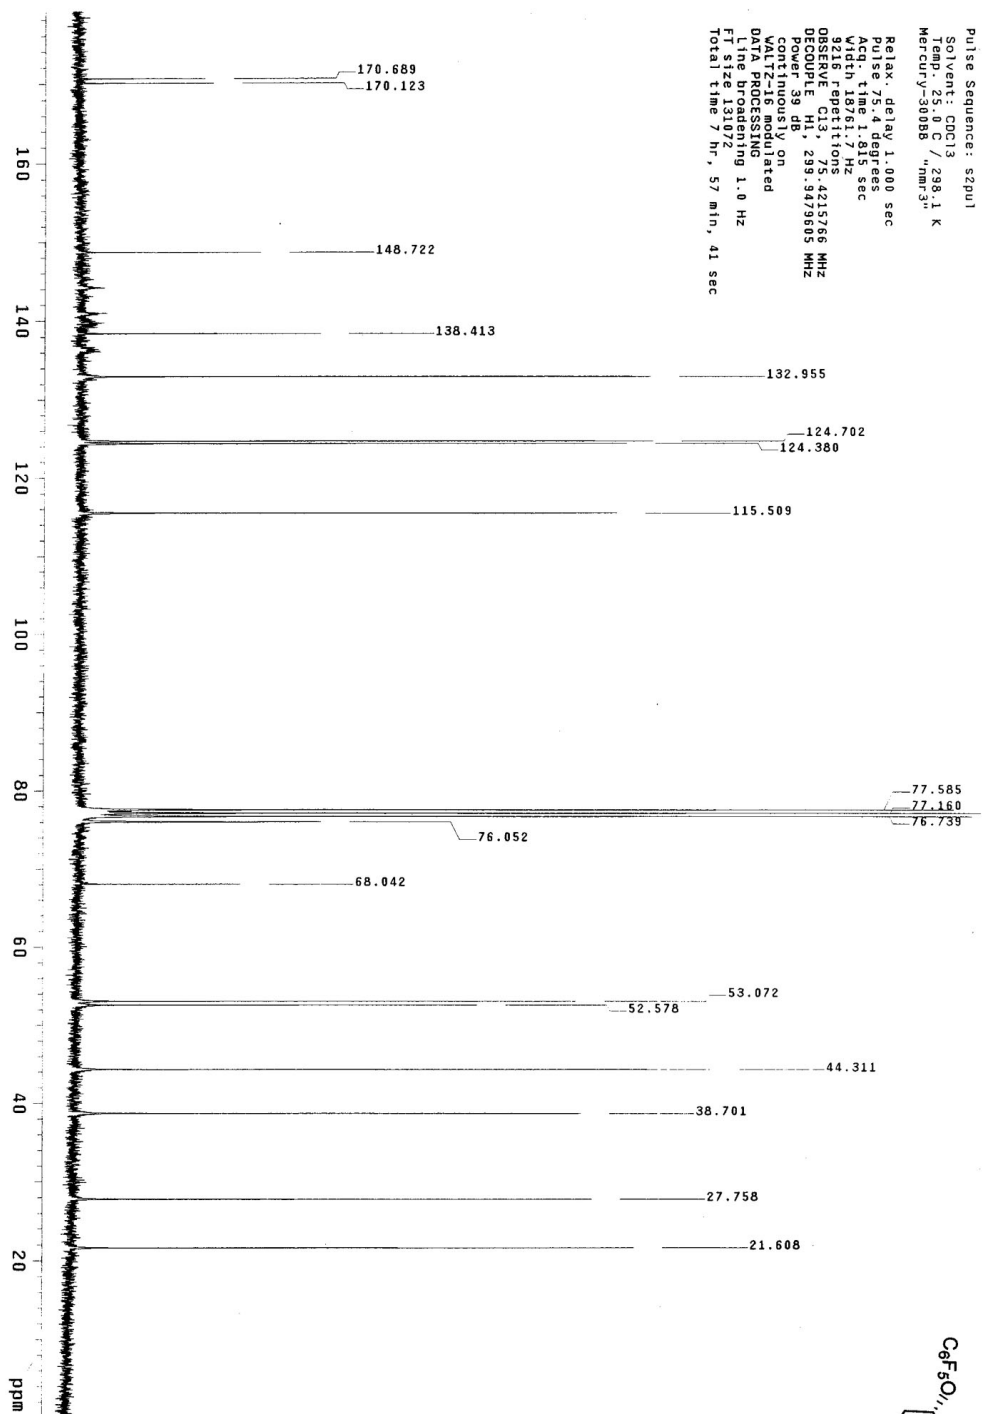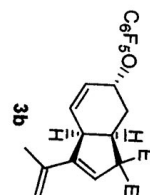

F71prod  
 Pulse Sequence: szpul  
 Solvent: CDCl3  
 NS: 512  
 File: HF71prod / 298.1 K  
 Mercury-40088 "mr4"  
 PULSE SEQUENCE  
 Relax. delay 1.000 sec  
 Pulse 44.3 degrees  
 Acq. time 2.731 sec  
 Vmax 1398.4 Hz  
 16 repetitions  
 OBSERVE H1 399.940669 MHz  
 DATA PROCESSING  
 Line broadening 0.1 Hz  
 F1 size 65536  
 Total time 1 min, 2 sec

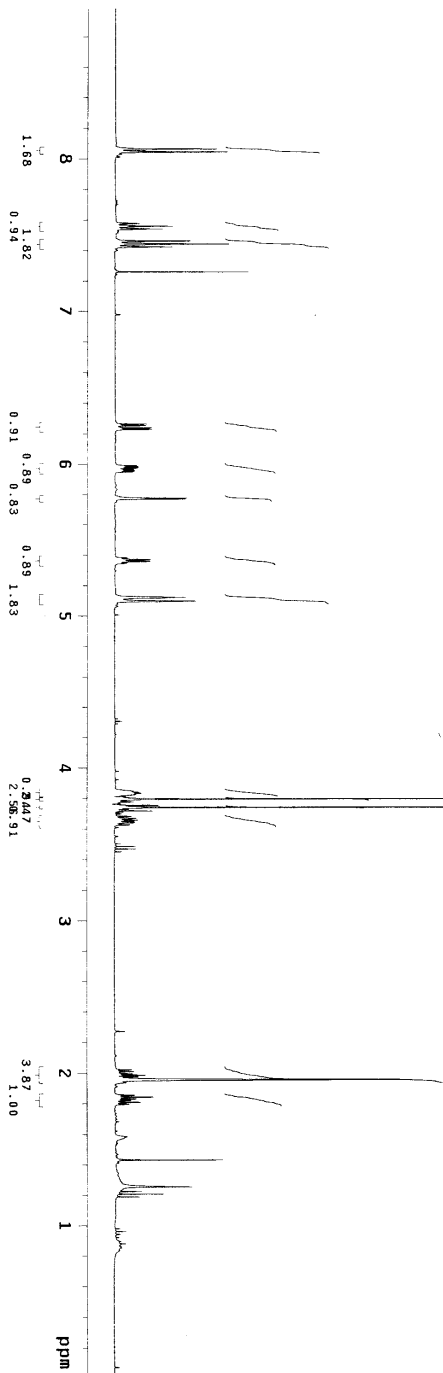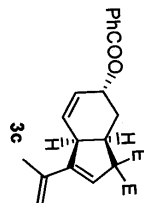

F71prod  
 Pulse Sequence: szpul  
 Solvent: CDCl3  
 Temp: 300.2 K  
 File: cf71prod  
 Mercury-40088 "nmr4"  
 PULSE SEQUENCE  
 Relax: delay 1.000 sec  
 Pulse 50.0 degrees  
 Acq: time 1.199 sec  
 Width 25000.0 Hz  
 Observed: 101.3150, 5651931 MHz  
 DECOUPLE: H1, 399.9420336 MHz  
 Power 42 dB  
 continuously on  
 VOLTAGE modulated  
 DATA PROCESSING  
 Time Processing 1.0 Hz  
 FI size 65536  
 Total time 42 min, 5 sec

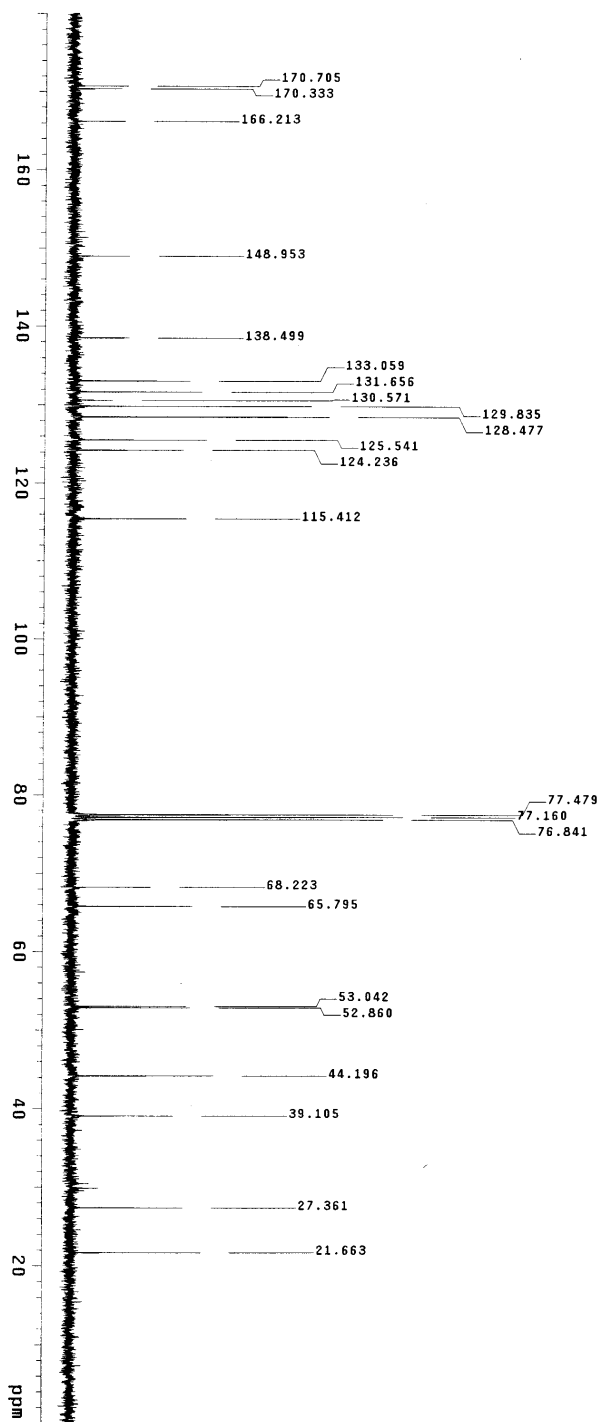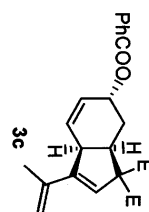

F124prod  
 Pulse Sequence: s2pu1  
 Solvent: CDCl3  
 Temp: 25.0 C / 298.1 K  
 Mercury-300BB "nmr3"  
 PULSE SEQUENCE  
 Relax. delay 1.000 sec  
 Pulse 37.3 degrees  
 Acq. time 0.130 sec  
 Width 4500.5 Hz  
 16 repetitions  
 OBSERVE H1 299.9464271 MHz  
 DATA PROCESSING  
 Processing time 0.1 Hz  
 FT size 32768  
 Total time 0 min, 49 sec

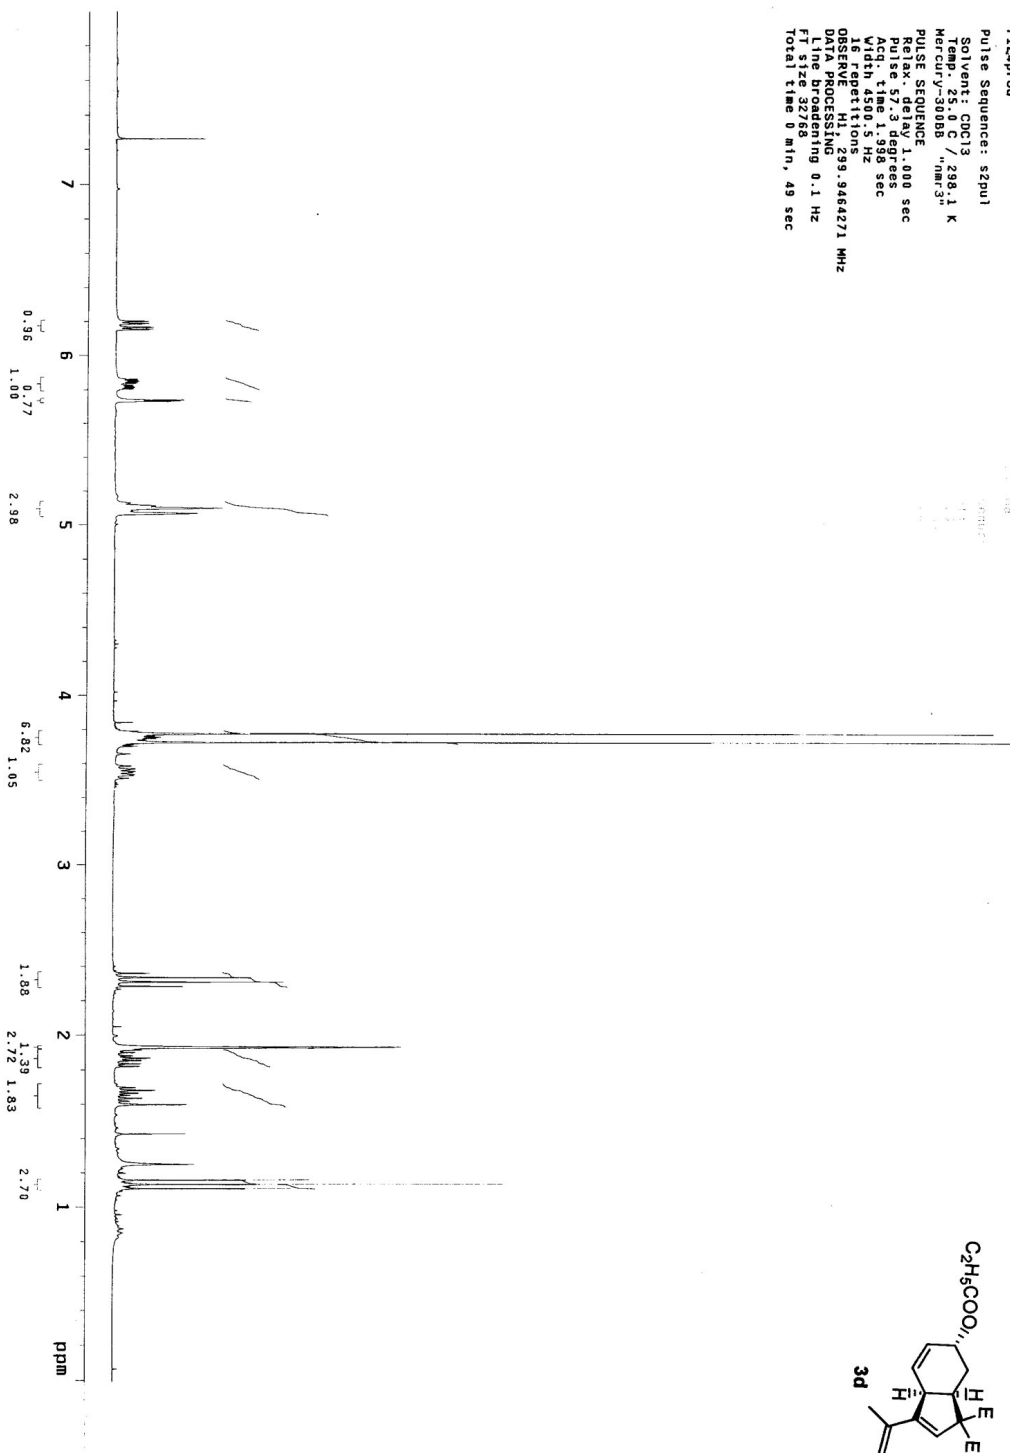

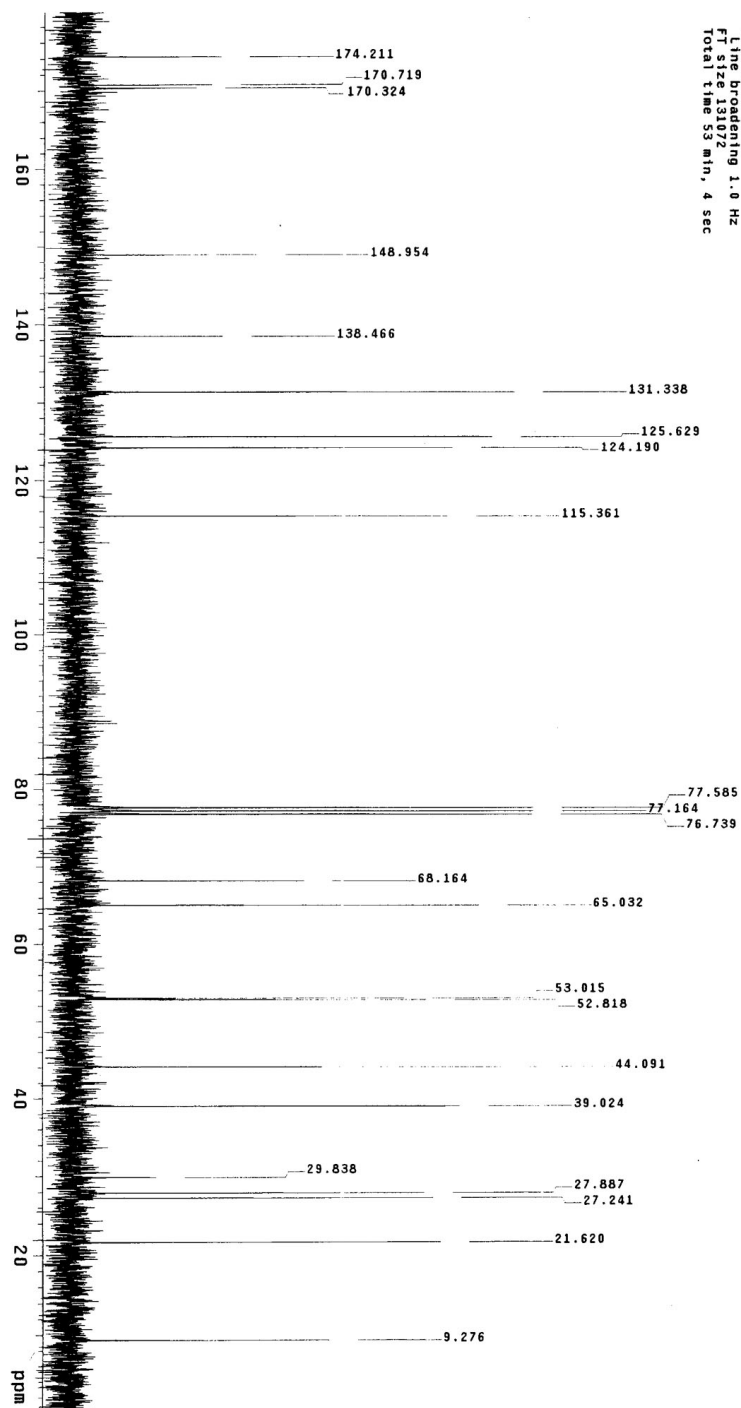

F124prod  
Pulse Sequence: szpu1  
Solvent: CDCl3  
Temp: 25.0 C / 298.1 K  
Mercury-300MB "nmr3"  
PULSE SEQUENCE  
Relax: delay 1.00 sec  
Pulse: 75.4 degrees  
Acq: time 1.015 sec  
NUC1: 13C1013  
NUC2: 1H10507  
OBSERVE C13 75.421571 MHz  
DECOUPLE H1 299.9473604 MHz  
Power 39 dB  
continuously on  
NMR2: 200.628100 MHz  
DATA ACQUISITION  
Line broadening 1.0 Hz  
FT size 131072  
Total time 53 min, 4 sec

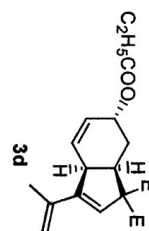



STANDARD PROTON  
Pulse Sequence: s2pu1  
Solvent: CDCl3  
Temp: 25.0 °C / 298.1 K  
File: HVINYL  
INNOVA-500 1mm5"

Relax: delay 1.000 sec  
Pulse 4.2 deg us  
Acq: time 2.731 sec  
Width 5998.8 Hz  
16 repetitions  
OBSERVE H1 509.9408603 MHz  
D1 0.00000000 sec  
Line broadening 0.1 Hz  
FT size 65536  
Total time 1 min, 2 sec

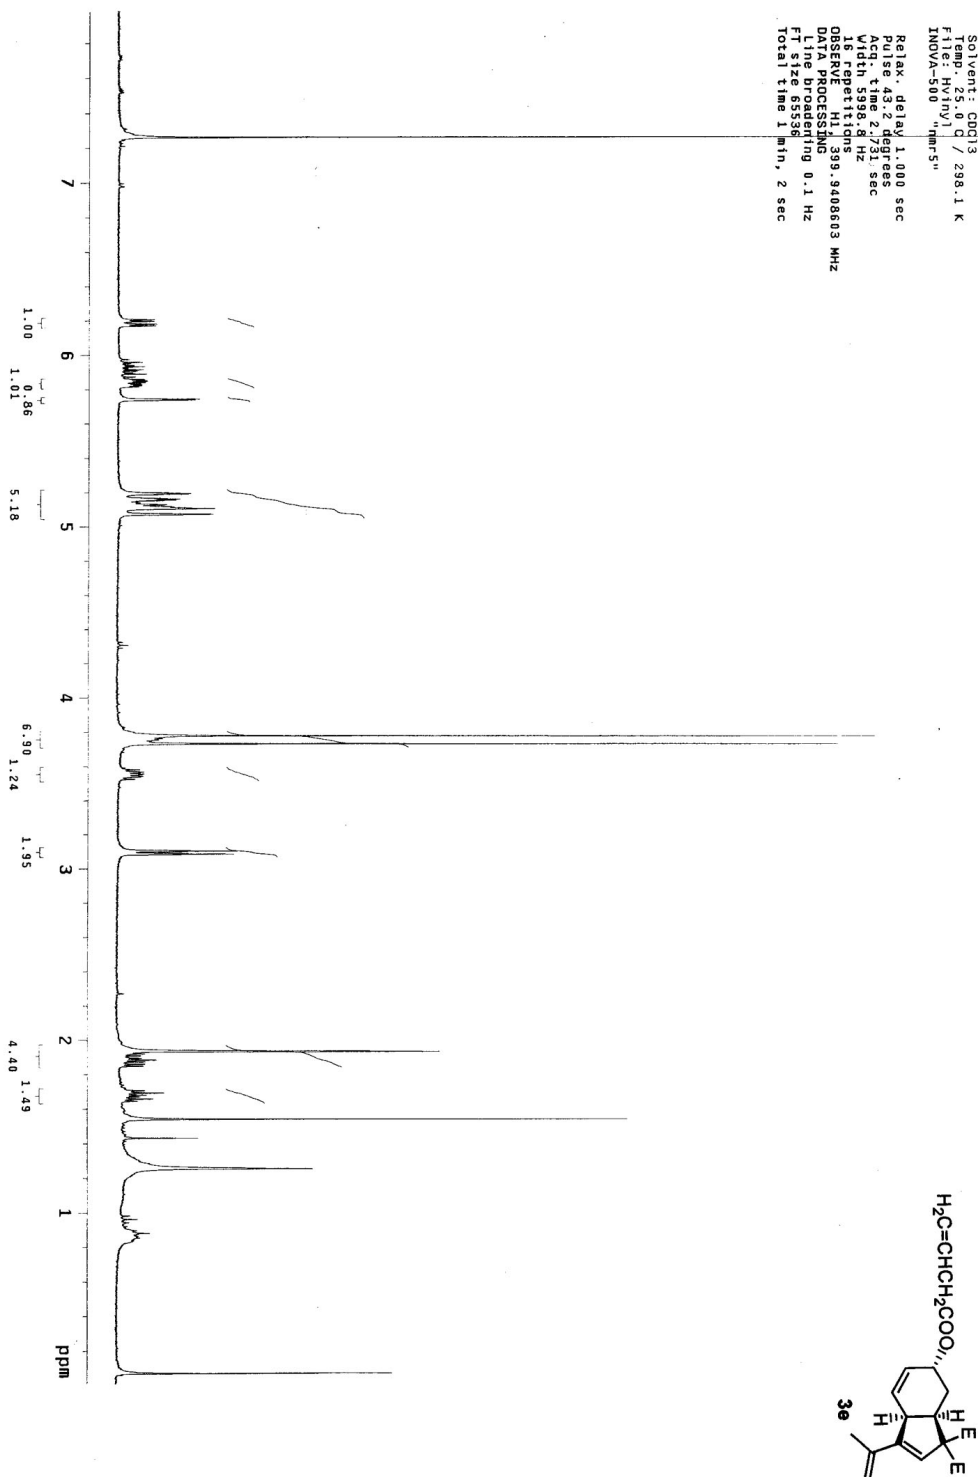

f127prod  
 Pulse Sequence: szpu1  
 Solvent: CDCl3  
 Temp: 25.0 C / 298.1 K  
 File: H127prod"nmr4"  
 Name: f127prod  
 PULSE SEQUENCE  
 1.00 sec  
 Pulse: 57.8 degrees  
 Acq. time 2.731 sec  
 Width 5998.8 Hz  
 16 repetitions 99.9408605 MHz  
 OBSERVATION  
 DATA PROCESSING  
 Line broadening 0.1 Hz  
 FT size 65536  
 Total time 1 min, 2 sec

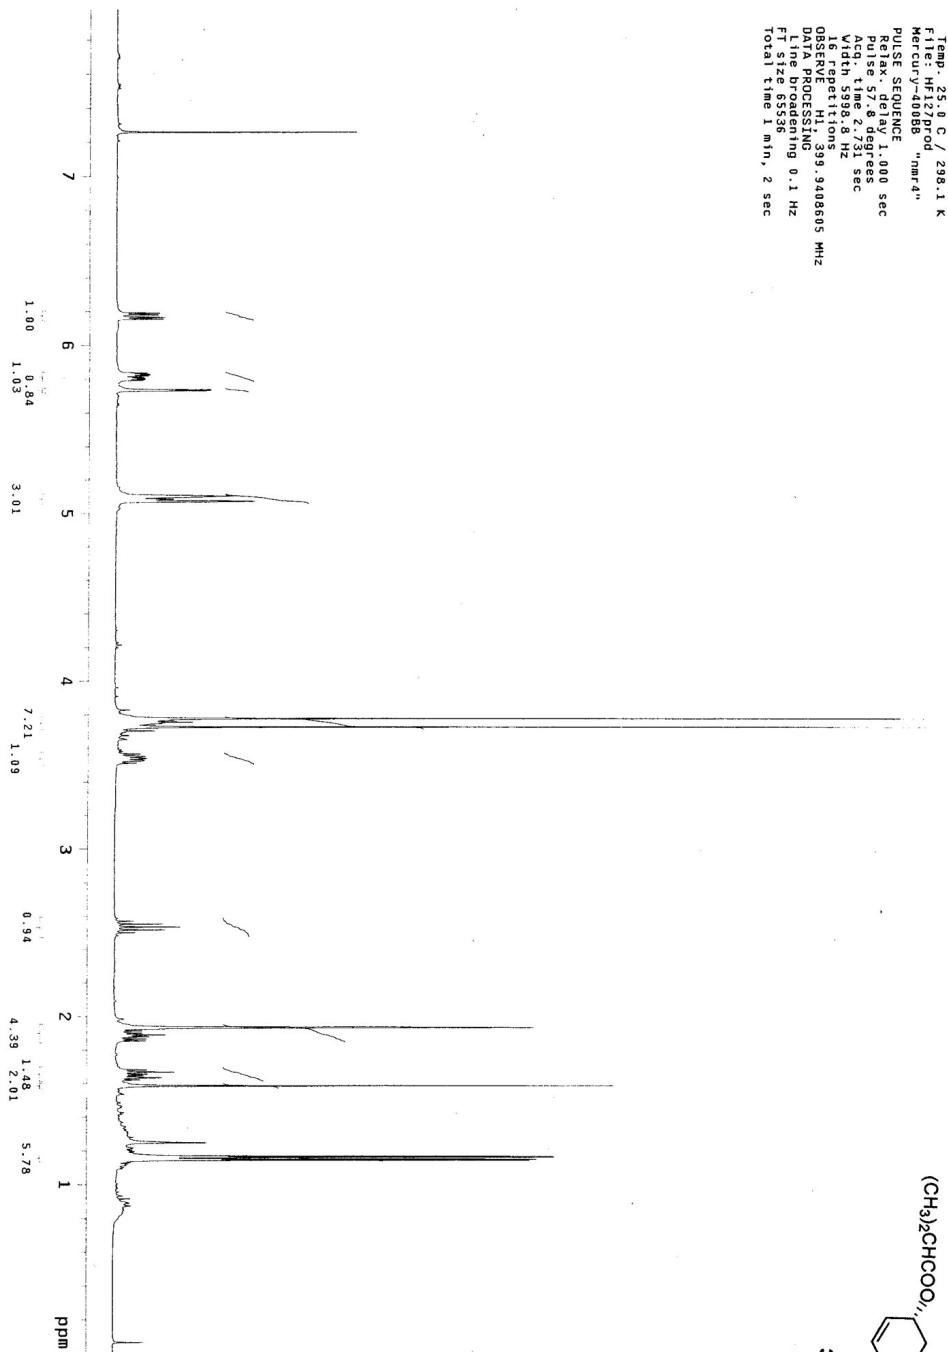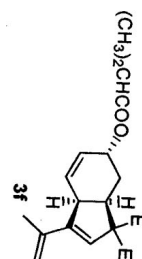

F127prod

Pulse Sequence: szpu1

Solvent: CDCl3 / 298.1 K  
Temp: 298.1 K  
Mercury-400B "nmr4"

PULSE SEQUENCE

Relax: delay 1.000 sec  
Pulse: 57.0 degrees  
Acq. time 1.199 sec

Width: 25000.0 Hz  
Obsrv: C13, 100.551946 MHz  
Decouple: H1, 399.9428336 MHz

Power: 40 dB  
Continuously on

Acquisition: 42 min, 5 sec  
Line broadening 1.0 Hz  
FT size 65536  
Total time 42 min, 5 sec

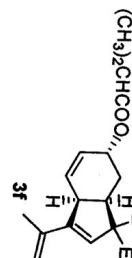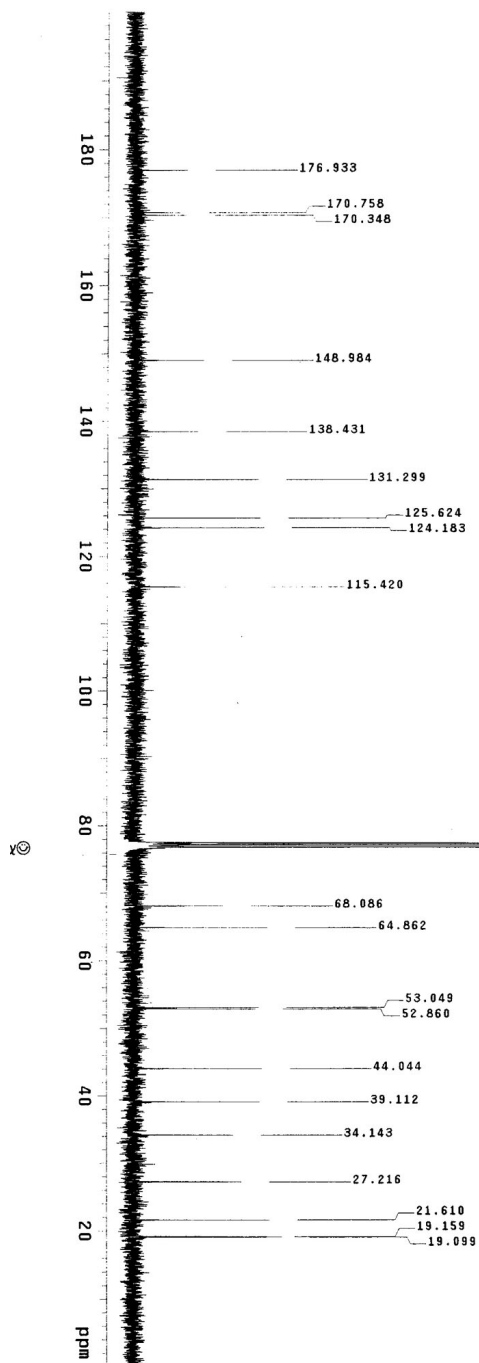

HF151b1p1c5

Pulse Sequence: s2pu1  
 Solvent: CDCl3  
 Temp: 25.0 C / 298.1 K  
 Mercury-400MHz  
 PULSE SEQUENCE  
 Relax: delay 1.000 sec  
 Pulse 45.2 degrees  
 Width 15.00 Hz  
 Acq: 1.062731 sec  
 16 repetitions  
 OBSERVE H1, 399.9408507 MHz  
 DATA PROCESSING  
 Time Broadening 0.1 Hz  
 Frequency 399.9408507 MHz  
 Total time 1 min, 2 sec

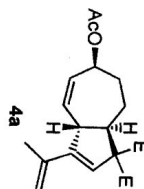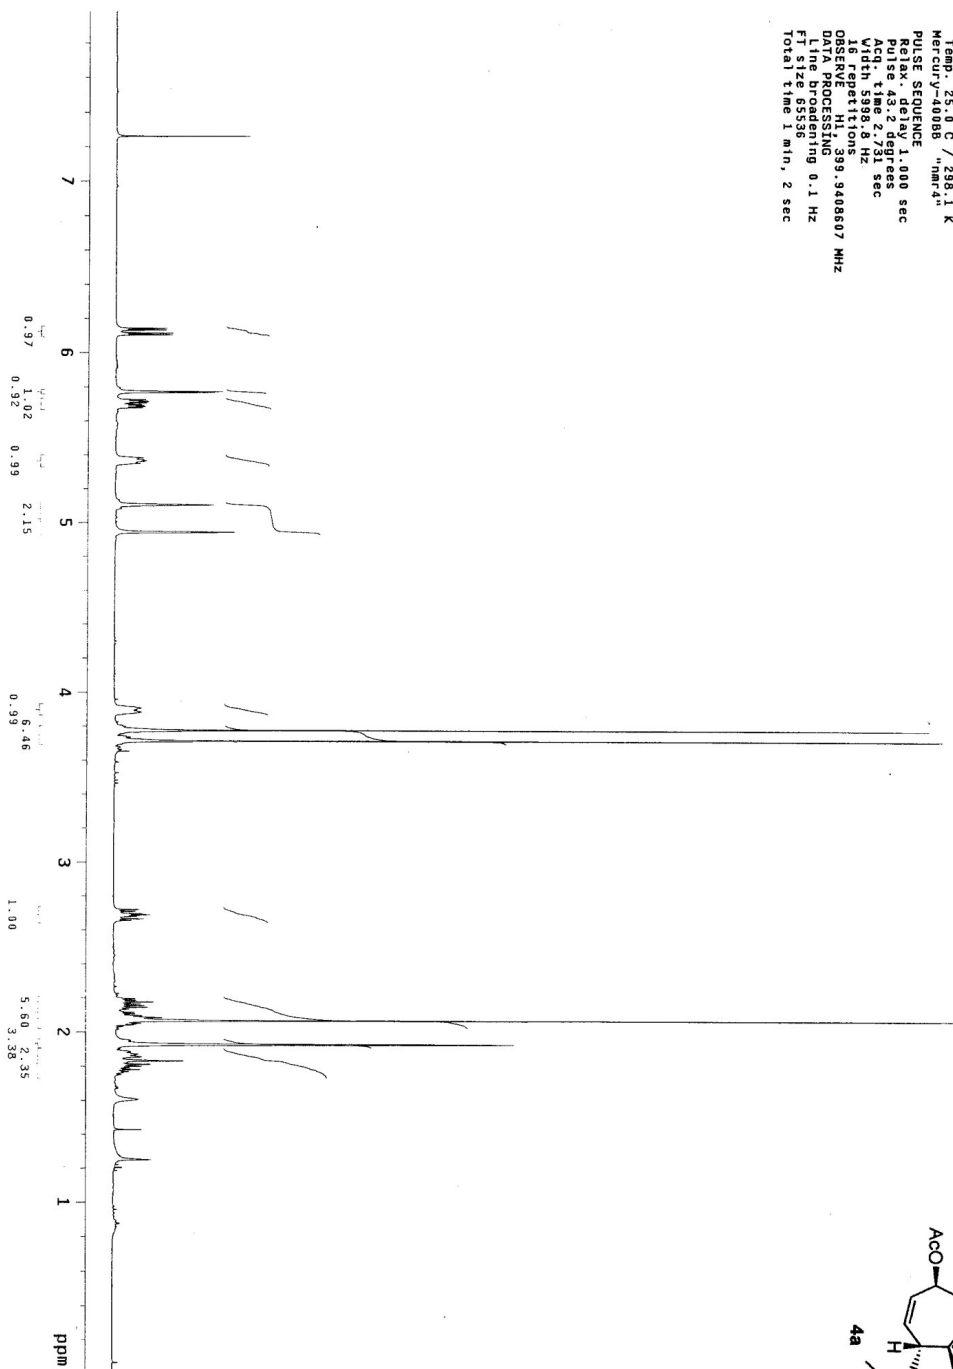

STANDARD PROTON

Pulse Sequence: szpu1

Solvent: CDCl3

Temp: 45.0 C / 298.1 K

F1: 400.135012

INOVA-500 "nmr5"

Relax. delay: 1.000 sec

Pulse: 43.2 degrees

Acq. time: 2.731 sec

Width: 5398.8 Hz

ns: 8 repetitions

OBSERVED: 119.939, 94.0607 MHz

DATA PROCESSING

Line broadening: 0.1 Hz

FT size: 65536

Total time: 1 min, 2 sec

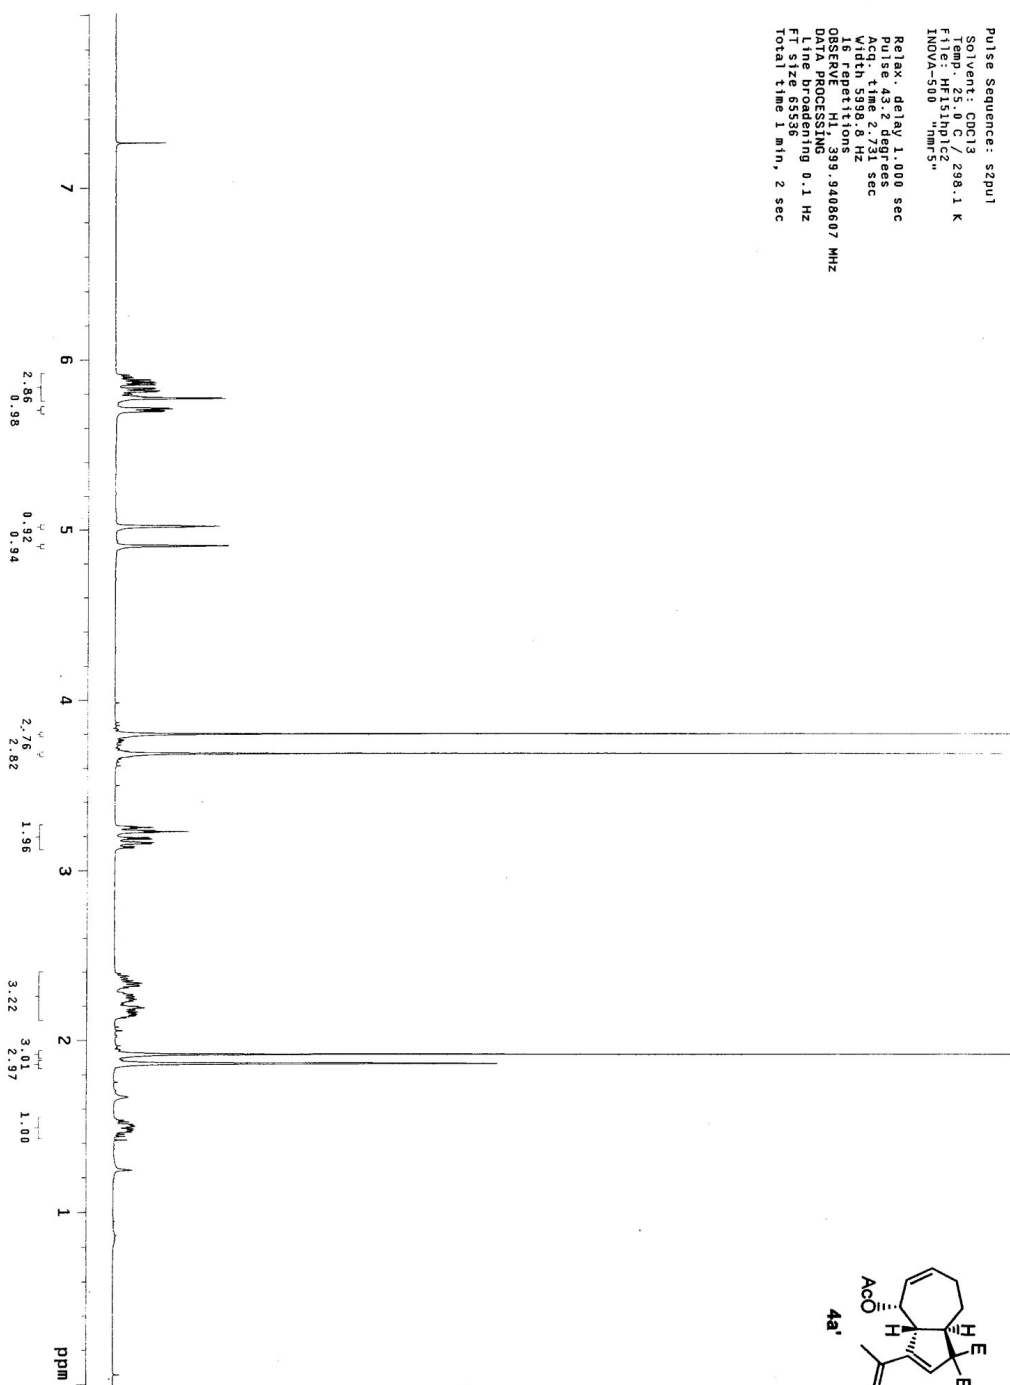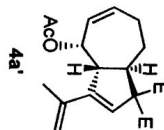

STANDARD 1H OBSERVE

Pulse Sequence: szpu1  
 Solvent: CDCl3  
 Temp: 25.0 C / 298.1 K  
 File: iso326 "nmr3"  
 Mercury-300MB "nmr3"  
 PULSE SEQUENCE  
 Relax: delay 1.000 sec  
 Relax: delay 1.000 sec  
 Acq: time 1.998 sec  
 Width 4500.5 Hz  
 16 repetitions  
 OBSERVE H1: 299.9464283 MHz  
 OBSERVE F2: 125.7611540 MHz  
 Line broadening 0.1 Hz  
 FT size 32768  
 Total time 0 min. 49 sec

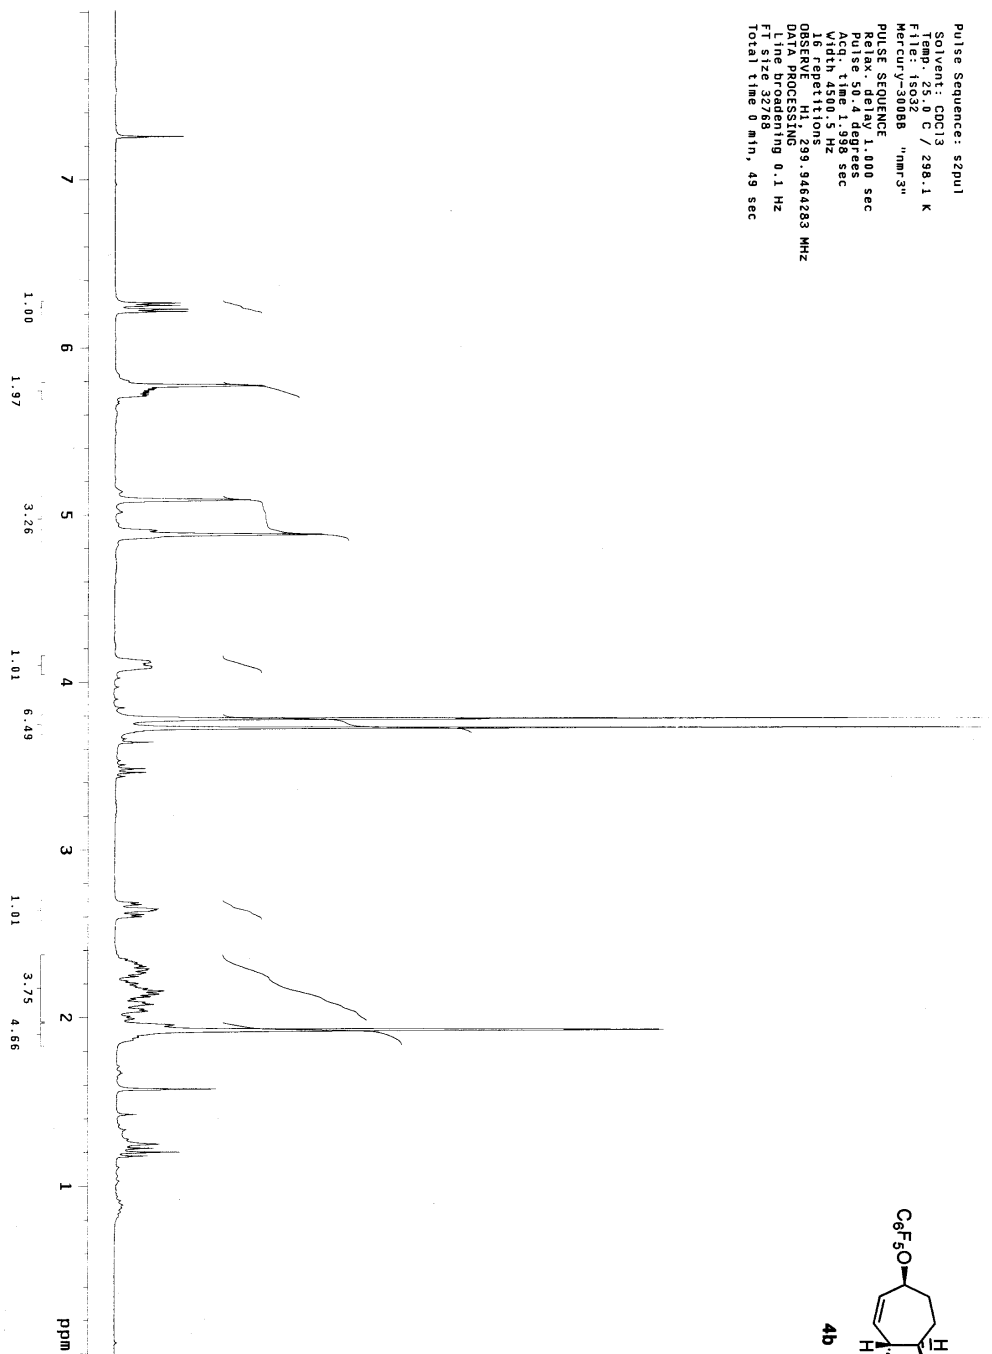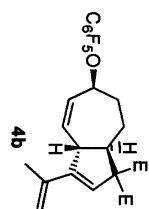

13C OBSERVE

Pulse Sequence: s2pul  
 Solvent: CDCl3  
 Temp: 300 K / 230.1 K  
 File: 13C032 "mar3"  
 Mercury-300BB  
 PULSE SEQUENCE  
 Relax. delay 10.000 sec  
 Pulse 71.8 degrees  
 Acq. time 1.815 sec  
 Width 1861.0 Hz  
 OBSERVE C13 101.75, 4215714 MHz  
 DECOUPLE H1, 299.9479604 MHz  
 Power 42 dB  
 continuously on  
 WALTZ16 modulated  
 0.111 Hz  
 Line broadening 1.0 Hz  
 FT size 131072  
 Total time 3 hr, 26 min, 40 sec

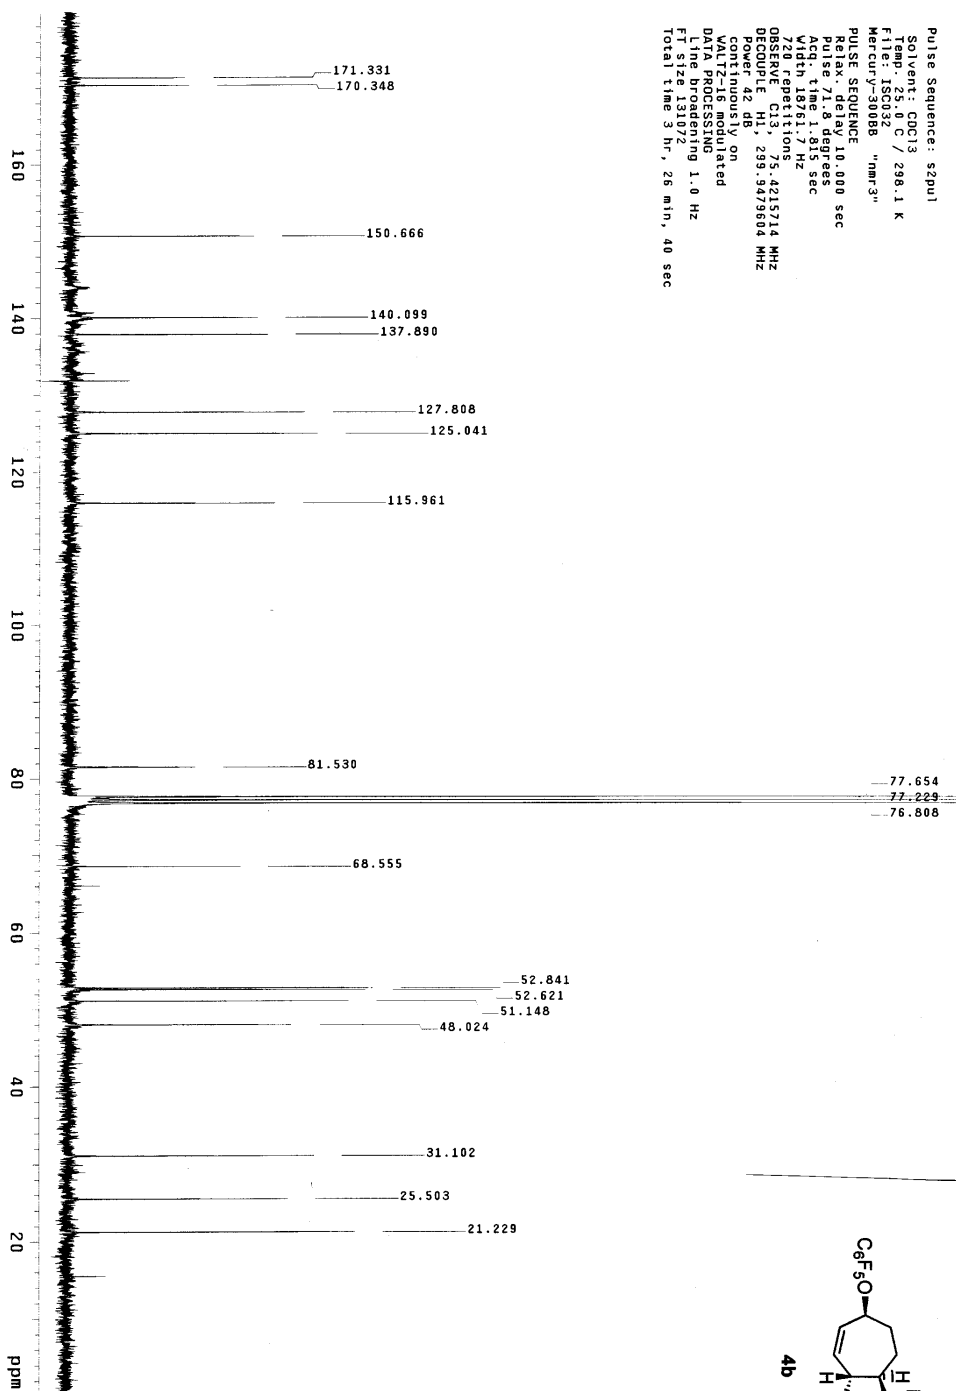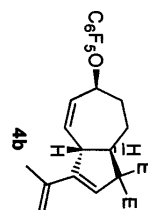

STANDARD PROTON  
Pulse Sequence: szpul  
Solvent: CDCl3  
Temp: 300.2 K  
File: H1smpt1vsj1  
Mercury-40088 "mer-4"  
PULSE SEQUENCE  
Relax. delay 1.000 sec  
Pulse 44.3 degrees  
Acq. time 2.731 sec  
NUC1: 13C  
NUC2: 1H  
16 repetitions  
OBSERVE H1, 399.9408614 MHz  
DATA PROCESSING  
Line broadening 0.1 Hz  
F1 size 32768  
F2 size 65536  
Total time 1 min, 2 sec

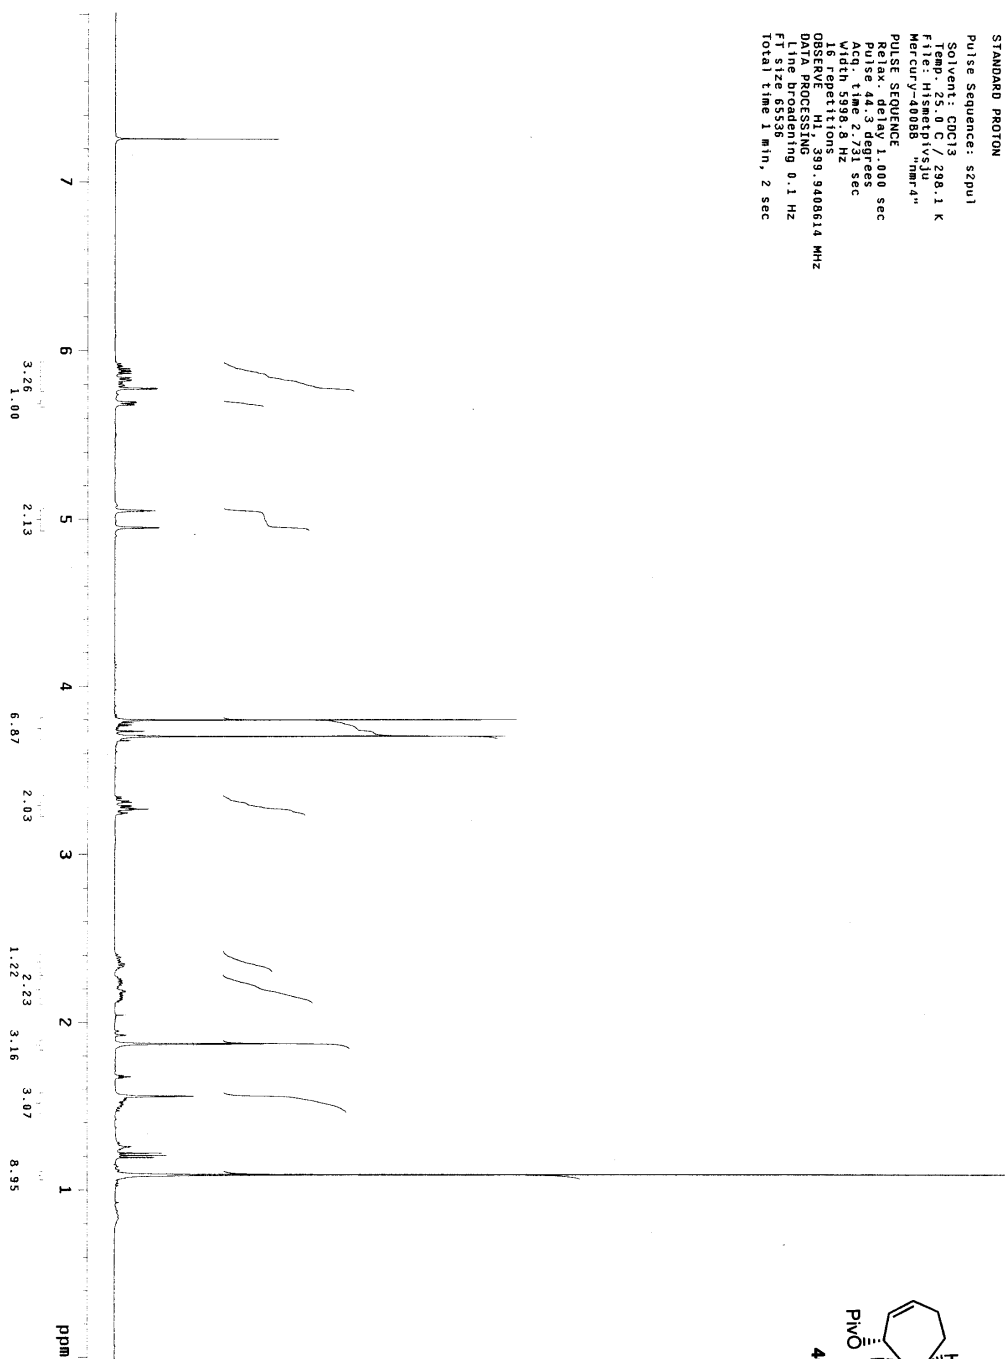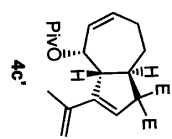

Supplement: Supplementary file 1 [file 5789931]
